# Supplementary material for: Attractive acceptor–acceptor interactions in self-complementary quadruple hydrogen bonds for molecular self-assembly
Source: Royal Society of Chemistry journal article supplement (doi:10.1039/d4cp02361g), 2024-01-01

## Supplementary information for “Attractive acceptor—acceptor interactions in self-complementary quadruple hydrogen bonds for molecular self-assembly”

Usman Ahmed <sup>1</sup>, Christopher Daub<sup>1</sup>, Dage Sundholm<sup>1</sup>, and Mikael P. Johansson <sup>2,1,\*</sup>

<sup>1</sup> Department of Chemistry, University of Helsinki, P.O. Box 55, FI-00014 Helsinki, Finland

<sup>2</sup> CSC – IT Center for Science Ltd., P.O. Box 405, FI-02101 Espoo, Finland

\* To whom correspondence should be addressed. Email: [mikael.johansson@csc.fi](mailto:mikael.johansson@csc.fi)

### 1. Interaction energies at SAPT and coupled cluster levels

The total interaction energies between the dimers were computed at four different levels of theory: SAPT, CCSD, CCSD(T), and Goodson’s continued-fraction extrapolation towards Full Configuration Interaction (FCI), CCSD(T)-cf. The interaction energies are extrapolated to the basis-set limit, using the two-point formula by Halkier *et al.*, based on aug-cc-pVTZ and aug-cc-pVQZ energies. Table S1.1 shows the interaction energies for the DDAA dimers, and Table S1.2 for the DADA dimers.

**Table S1.1.** Comparison of hydrogen-bonding energies (in kJ/mol) for the DDAA-AADD arrays. The average hydrogen-binding energy is reported for the dimers DDAA02-DDAA08.

| Molecule | SAPT   | CCSD   | CCSD(T) | CCSD(T)-cf |
|----------|--------|--------|---------|------------|
| DDAA01   | -216.6 | -      | -       | -          |
| DDAA02   | -250.5 | -220.5 | -222.7  | -223.1     |
| DDAA03   | -157.7 | -137.6 | -141.0  | -141.7     |
| DDAA04   | -140.0 | -125.2 | -129.0  | -129.8     |
| DDAA05   | -164.1 | -149.8 | -153.0  | -153.4     |
| DDAA06   | -334.3 | -292.6 | -293.3  | -293.6     |
| DDAA07   | -257.6 | -227.3 | -229.0  | -229.5     |
| DDAA08   | -235.2 | -207.9 | -211.0  | -211.6     |

|                |               |               |               |               |
|----------------|---------------|---------------|---------------|---------------|
| <b>Average</b> | <b>-219.9</b> | <b>-194.4</b> | <b>-197.0</b> | <b>-197.5</b> |
|----------------|---------------|---------------|---------------|---------------|

**Table S1.2.** Comparison of hydrogen-bonding energies (in kJ/mol) for the DDAA-AADD arrays. The average hydrogen-binding energy is reported for the dimers DDAA01-DDA06 and DDAA08.

| <b>Molecule</b> | <b>SAPT</b>   | <b>CCSD</b>   | <b>CCSD(T)</b> | <b>CCSD(T)-cf</b> |
|-----------------|---------------|---------------|----------------|-------------------|
| DADA01          | -152.5        | -131.4        | -132.8         | -133.2            |
| DADA02          | -132.9        | -120.4        | -122.3         | -122.8            |
| DADA03          | -127.3        | -115.3        | -118.0         | -118.6            |
| DADA04          | -149.6        | -126.6        | -129.6         | -130.4            |
| DADA05          | -152.0        | -129.6        | -131.4         | -131.9            |
| DADA06          | -153.1        | -130.8        | -132.3         | -132.7            |
| DADA07          | -208.8        | -             | -              | -                 |
| DADA08          | -137.9        | -120.5        | -124.2         | -124.9            |
| <b>Average</b>  | <b>-143.6</b> | <b>-124.9</b> | <b>-127.2</b>  | <b>-127.8</b>     |

## 2. Molecular structures

Molecular structures of the studied dimers.

### 2.1 DDAA dimers

DDAA01

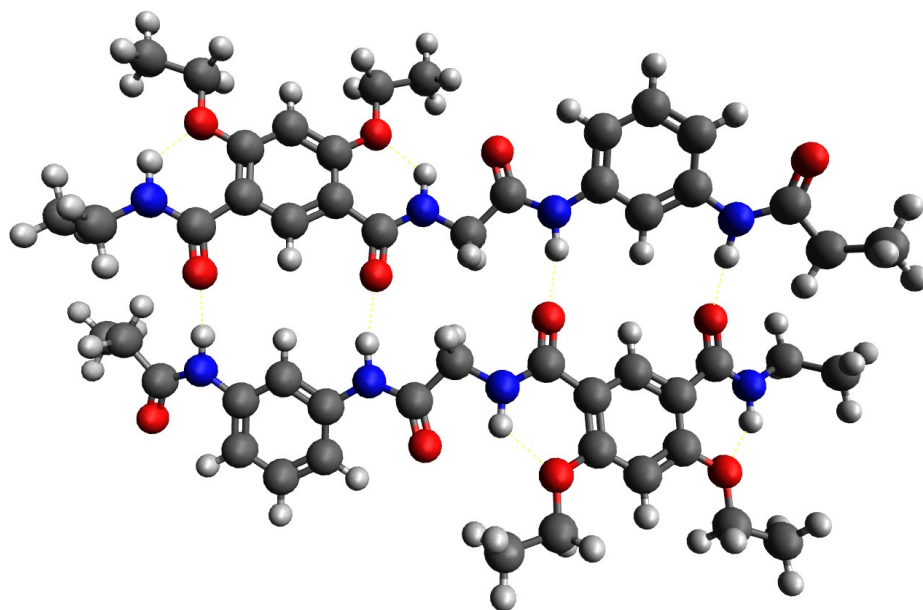

DDAA02

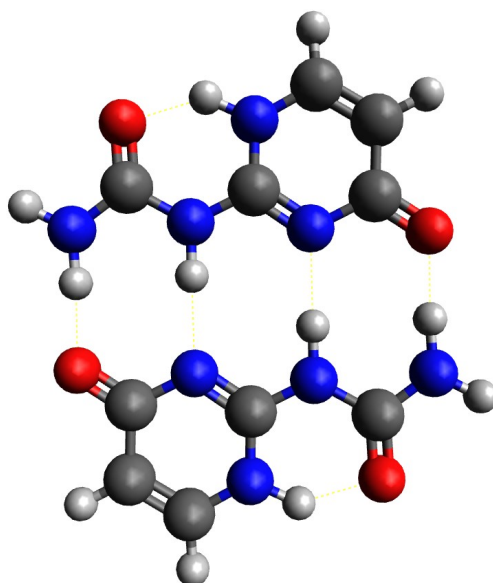

DDAA03

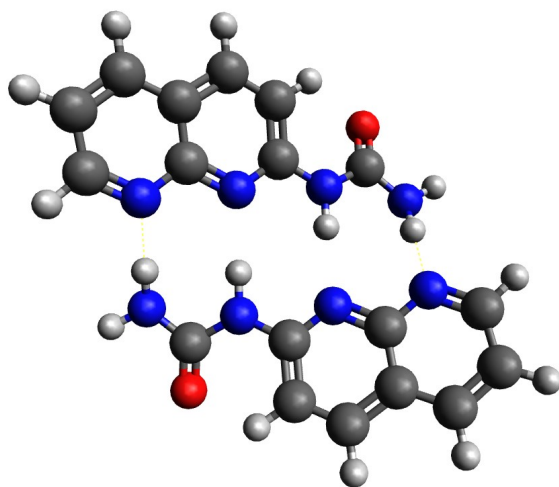

DDAA04

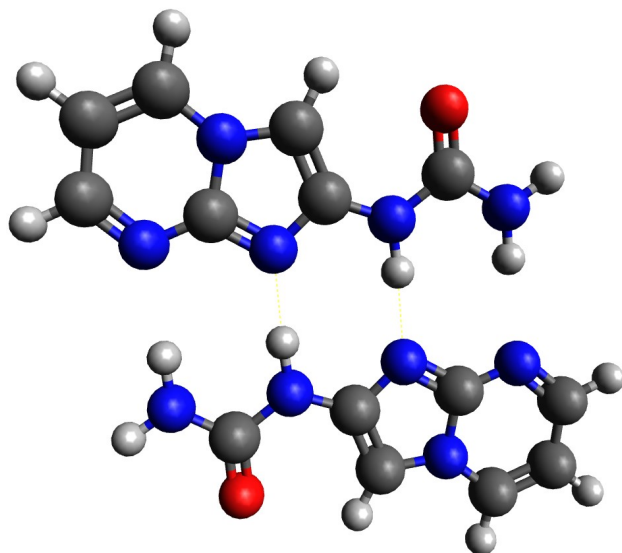

DDAA05

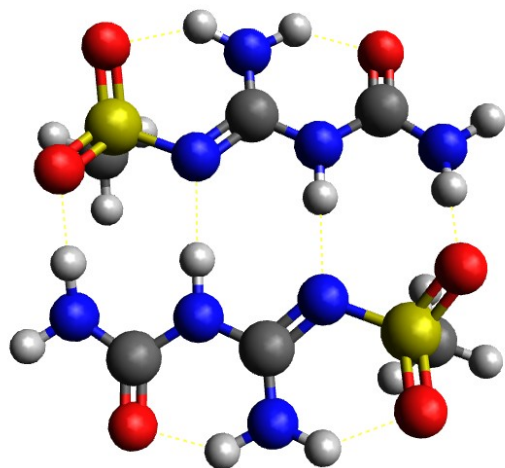

DDAA06

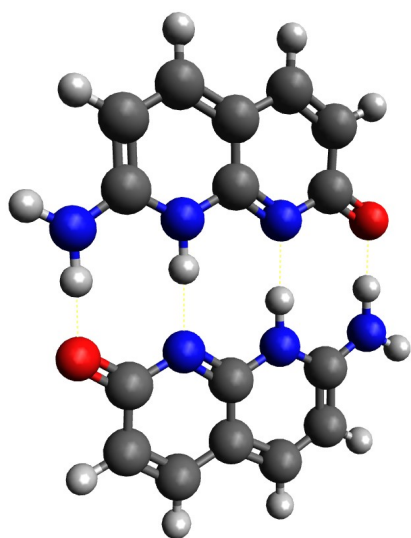

DDAA07

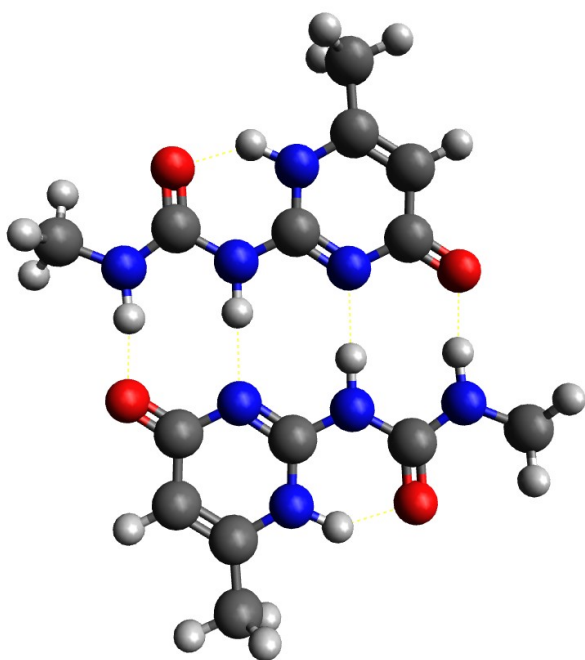

DDAA08

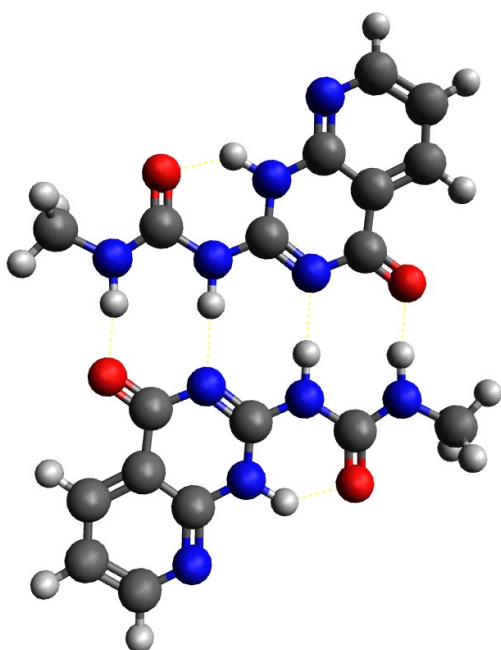

## 2.2 DADA dimers

DADA01

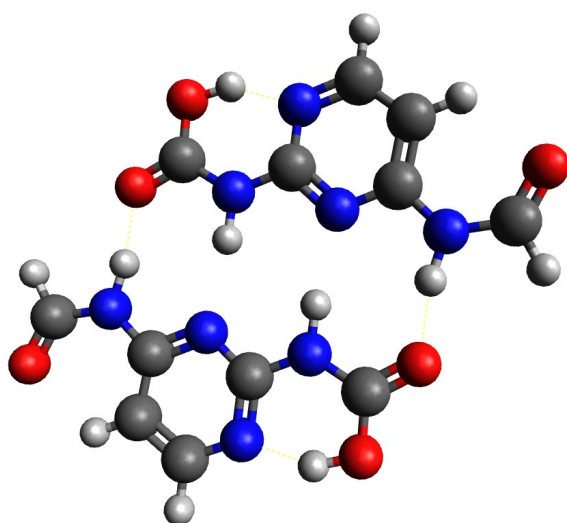

DADA02

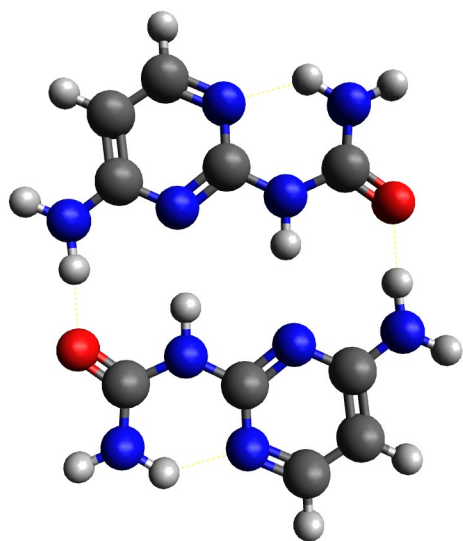

DADA03

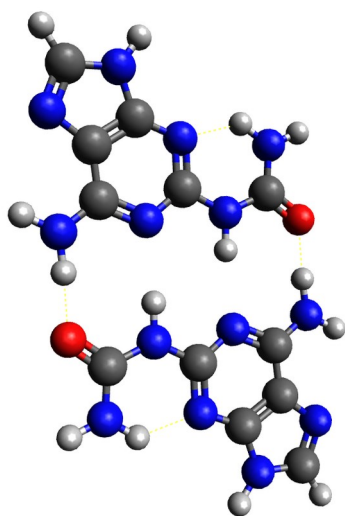



DADA04

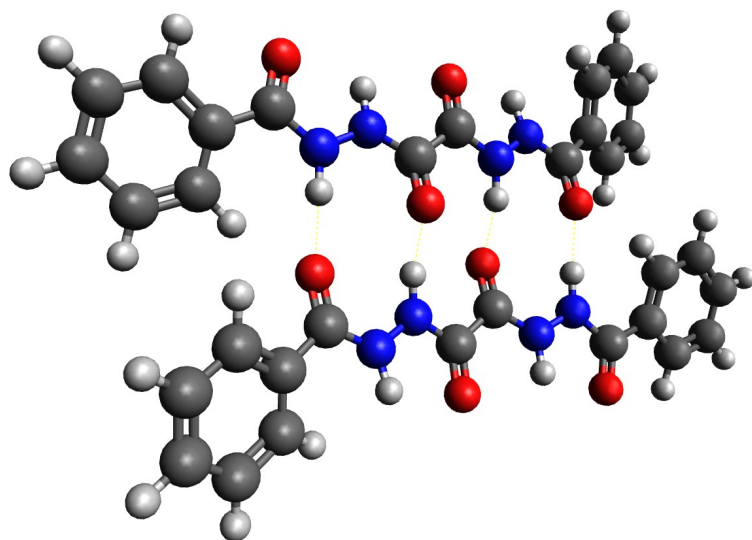

DADA05

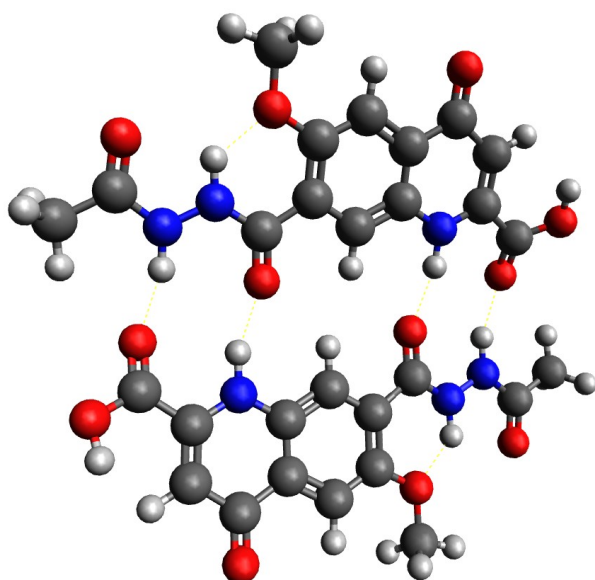

DADA06

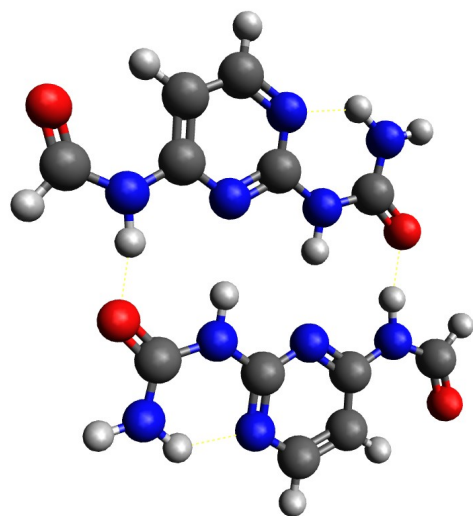

DADA07

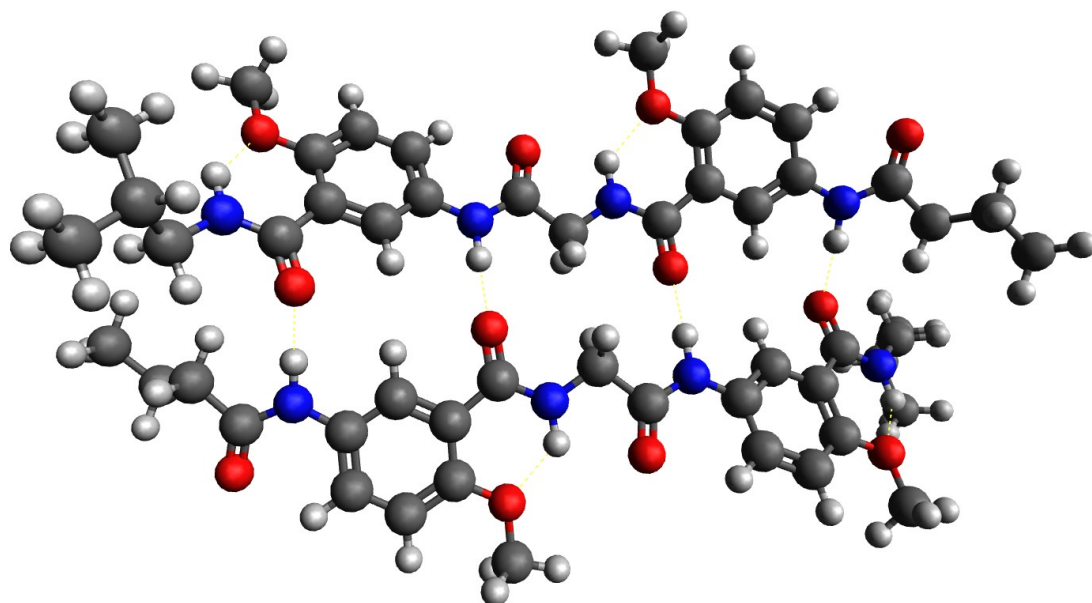

DADA08

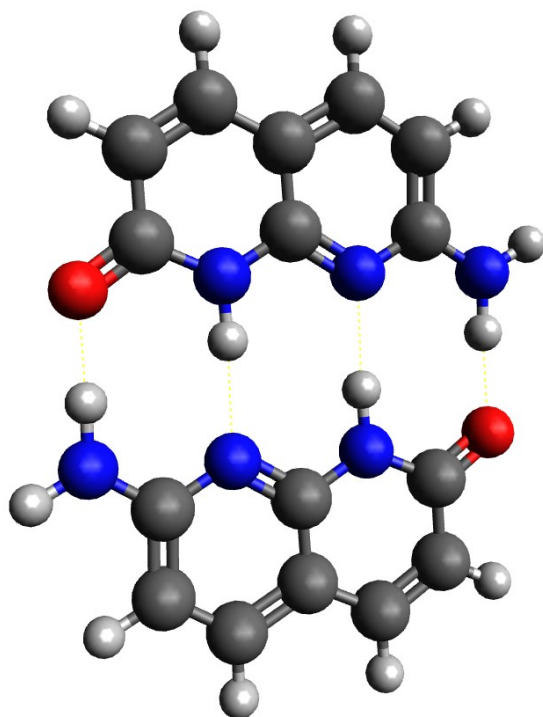

## 2.3 Cartesian coordinates

DDAA01

134

|   |            |           |            |
|---|------------|-----------|------------|
| C | -4.4372625 | 3.5304096 | -3.6110366 |
| C | -5.6365908 | 2.8546721 | -3.4031632 |
| C | -3.2719725 | 3.1339481 | -2.9539893 |
| C | -5.6995494 | 1.7728307 | -2.5039867 |
| C | -3.2953830 | 2.0386579 | -2.0651458 |
| C | -4.5178314 | 1.4113434 | -1.8662220 |
| O | -2.0989380 | 3.7795068 | -3.1407287 |
| O | -6.7794917 | 3.2196360 | -4.0489638 |
| C | -6.9055489 | 0.9582864 | -2.1606644 |
| N | -7.9774884 | 1.0564196 | -2.9762596 |
| O | -6.8880481 | 0.2022373 | -1.1825056 |
| C | -2.1246801 | 1.4516629 | -1.3398781 |
| N | -0.9042654 | 1.9027038 | -1.6600026 |
| O | -2.2897629 | 0.5537025 | -0.4993875 |
| C | 0.3083280  | 1.3254970 | -1.1444781 |
| C | 1.4569977  | 1.8068231 | -2.0316849 |
| N | 2.6520275  | 1.2612050 | -1.7135308 |
| O | 1.2486341  | 2.6164107 | -2.9323730 |
| C | 3.8950238  | 1.4670406 | -2.3464759 |
| C | 4.0384503  | 2.1857576 | -3.5370374 |
| C | 5.3055572  | 2.2979183 | -4.0954544 |
| C | 6.4296266  | 1.7270491 | -3.5139924 |

|   |             |            |            |
|---|-------------|------------|------------|
| C | 6.2792930   | 1.0174496  | -2.3176912 |
| C | 5.0125220   | 0.8913737  | -1.7429093 |
| N | 7.3504922   | 0.4182818  | -1.6373810 |
| C | 8.6293210   | 0.2259311  | -2.0823999 |
| O | 9.0394196   | 0.5520807  | -3.1880727 |
| C | -2.0129878  | 4.8566996  | -4.0896031 |
| C | -0.5852163  | 5.3533570  | -4.0733887 |
| C | -6.7571666  | 4.3413584  | -4.9440795 |
| C | -8.1604895  | 4.5118529  | -5.4817262 |
| C | -9.2145991  | 0.3234191  | -2.7659087 |
| C | 9.5423691   | -0.4359251 | -1.0589214 |
| C | -10.3977971 | 1.2582399  | -2.5367004 |
| C | 10.4717080  | -1.4550156 | -1.7113352 |
| H | -4.4042011  | 4.3677807  | -4.2879433 |
| H | -4.5483101  | 0.5732639  | -1.1858710 |
| H | -7.9247377  | 1.7338170  | -3.7225126 |
| H | -0.7790078  | 2.5994653  | -2.3867764 |
| H | 0.4949202   | 1.6241744  | -0.1084326 |
| H | 0.2570469   | 0.2363822  | -1.1500499 |
| H | 2.6470672   | 0.6082652  | -0.9293190 |
| H | 3.1777123   | 2.6357408  | -4.0026965 |
| H | 5.4207085   | 2.8509266  | -5.0204794 |
| H | 7.4045909   | 1.8140876  | -3.9645988 |
| H | 4.8995179   | 0.3357439  | -0.8198971 |
| H | 7.1503723   | 0.1063113  | -0.6897959 |
| H | -2.2981507  | 4.4777597  | -5.0760776 |
| H | -2.7161413  | 5.6425734  | -3.7960951 |
| H | 0.1077663   | 4.5478742  | -4.3132922 |
| H | -0.3256045  | 5.7441198  | -3.0889681 |
| H | -0.4718989  | 6.1543734  | -4.8063778 |
| H | -6.4310548  | 5.2284332  | -4.3930088 |
| H | -6.0421400  | 4.1438373  | -5.7484674 |
| H | -8.8652783  | 4.6941274  | -4.6693680 |
| H | -8.4767077  | 3.6224731  | -6.0291692 |
| H | -8.1916366  | 5.3628843  | -6.1639426 |
| H | -9.4003951  | -0.3157539 | -3.6345983 |
| H | -9.0494410  | -0.3233104 | -1.9066949 |
| H | 8.9502092   | -0.8867575 | -0.2615025 |
| H | 10.1347046  | 0.3654721  | -0.6035034 |
| H | -10.5585238 | 1.9111081  | -3.3987415 |
| H | -10.2306399 | 1.8852400  | -1.6599070 |
| H | -11.3108787 | 0.6809365  | -2.3784643 |
| H | 11.0077137  | -0.9951065 | -2.5411346 |
| H | 9.9053854   | -2.3015966 | -2.1052327 |
| H | 11.1970545  | -1.8352890 | -0.9891369 |
| C | 4.4372625   | -3.5304096 | 3.6110366  |
| C | 5.6365908   | -2.8546721 | 3.4031632  |
| C | 3.2719725   | -3.1339481 | 2.9539893  |
| C | 5.6995494   | -1.7728307 | 2.5039867  |
| C | 3.2953830   | -2.0386579 | 2.0651458  |
| C | 4.5178314   | -1.4113434 | 1.8662220  |
| O | 2.0989380   | -3.7795068 | 3.1407287  |
| O | 6.7794917   | -3.2196360 | 4.0489638  |
| C | 6.9055489   | -0.9582864 | 2.1606644  |
| N | 7.9774884   | -1.0564196 | 2.9762596  |
| O | 6.8880481   | -0.2022373 | 1.1825056  |
| C | 2.1246801   | -1.4516629 | 1.3398781  |

|   |             |            |           |
|---|-------------|------------|-----------|
| N | 0.9042654   | -1.9027038 | 1.6600026 |
| O | 2.2897629   | -0.5537025 | 0.4993875 |
| C | -0.3083280  | -1.3254970 | 1.1444781 |
| C | -1.4569977  | -1.8068231 | 2.0316849 |
| N | -2.6520275  | -1.2612050 | 1.7135308 |
| O | -1.2486341  | -2.6164107 | 2.9323730 |
| C | -3.8950238  | -1.4670406 | 2.3464759 |
| C | -4.0384503  | -2.1857576 | 3.5370374 |
| C | -5.3055572  | -2.2979183 | 4.0954544 |
| C | -6.4296266  | -1.7270491 | 3.5139924 |
| C | -6.2792930  | -1.0174496 | 2.3176912 |
| C | -5.0125220  | -0.8913737 | 1.7429093 |
| N | -7.3504922  | -0.4182818 | 1.6373810 |
| C | -8.6293210  | -0.2259311 | 2.0823999 |
| O | -9.0394196  | -0.5520807 | 3.1880727 |
| C | 2.0129878   | -4.8566996 | 4.0896031 |
| C | 0.5852163   | -5.3533570 | 4.0733887 |
| C | 6.7571666   | -4.3413584 | 4.9440795 |
| C | 8.1604895   | -4.5118529 | 5.4817262 |
| C | 9.2145991   | -0.3234191 | 2.7659087 |
| C | -9.5423691  | 0.4359251  | 1.0589214 |
| C | 10.3977971  | -1.2582399 | 2.5367004 |
| C | -10.4717080 | 1.4550156  | 1.7113352 |
| H | 4.4042011   | -4.3677807 | 4.2879433 |
| H | 4.5483101   | -0.5732639 | 1.1858710 |
| H | 7.9247377   | -1.7338170 | 3.7225126 |
| H | 0.7790078   | -2.5994653 | 2.3867764 |
| H | -0.4949202  | -1.6241744 | 0.1084326 |
| H | -0.2570469  | -0.2363822 | 1.1500499 |
| H | -2.6470672  | -0.6082652 | 0.9293190 |
| H | -3.1777123  | -2.6357408 | 4.0026965 |
| H | -5.4207085  | -2.8509266 | 5.0204794 |
| H | -7.4045909  | -1.8140876 | 3.9645988 |
| H | -4.8995179  | -0.3357439 | 0.8198971 |
| H | -7.1503723  | -0.1063113 | 0.6897959 |
| H | 2.2981507   | -4.4777597 | 5.0760776 |
| H | 2.7161413   | -5.6425734 | 3.7960951 |
| H | 0.3256045   | -5.7441198 | 3.0889681 |
| H | -0.1077663  | -4.5478742 | 4.3132922 |
| H | 0.4718989   | -6.1543734 | 4.8063778 |
| H | 6.4310548   | -5.2284332 | 4.3930088 |
| H | 6.0421400   | -4.1438373 | 5.7484674 |
| H | 8.4767077   | -3.6224731 | 6.0291692 |
| H | 8.8652783   | -4.6941274 | 4.6693680 |
| H | 8.1916366   | -5.3628843 | 6.1639426 |
| H | 9.4003951   | 0.3157539  | 3.6345983 |
| H | 9.0494410   | 0.3233104  | 1.9066949 |
| H | -8.9502092  | 0.8867575  | 0.2615025 |
| H | -10.1347046 | -0.3654721 | 0.6035034 |
| H | 10.2306399  | -1.8852400 | 1.6599070 |
| H | 10.5585238  | -1.9111081 | 3.3987415 |
| H | 11.3108787  | -0.6809365 | 2.3784643 |
| H | -9.9053854  | 2.3015966  | 2.1052327 |
| H | -11.0077137 | 0.9951065  | 2.5411346 |
| H | -11.1970545 | 1.8352890  | 0.9891369 |

**DDAA02**

34

|   |            |            |            |
|---|------------|------------|------------|
| C | 1.1118360  | 4.1944160  | -0.0422388 |
| N | -0.0581903 | 3.4933381  | -0.0257443 |
| C | 2.2915122  | 3.5425181  | -0.0347372 |
| C | -0.0329496 | 2.1380244  | 0.0011063  |
| C | 2.2978338  | 2.0917759  | -0.0069341 |
| N | 1.0779940  | 1.4336871  | 0.0098277  |
| N | -1.2326224 | 1.4877161  | 0.0192392  |
| C | -2.4844910 | 2.1200286  | 0.0312069  |
| N | -3.5177818 | 1.2754401  | 0.0638818  |
| O | 3.3576520  | 1.4474370  | 0.0028757  |
| H | -1.1810800 | 0.4511300  | 0.0271505  |
| H | -3.4222648 | 0.2430844  | 0.0439150  |
| H | -4.4318898 | 1.6951537  | 0.0559161  |
| O | -2.6008856 | 3.3548816  | 0.0178008  |
| N | -1.0779940 | -1.4336871 | 0.0098277  |
| C | -2.2978338 | -2.0917759 | -0.0069341 |
| C | 0.0329496  | -2.1380244 | 0.0011063  |
| C | -2.2915122 | -3.5425181 | -0.0347372 |
| N | 0.0581903  | -3.4933381 | -0.0257443 |
| C | -1.1118360 | -4.1944160 | -0.0422388 |
| N | 1.2326224  | -1.4877161 | 0.0192392  |
| C | 2.4844910  | -2.1200286 | 0.0312069  |
| N | 3.5177818  | -1.2754401 | 0.0638818  |
| O | 2.6008856  | -3.3548816 | 0.0178008  |
| H | 1.0148327  | -3.8925783 | -0.0213112 |
| H | 1.1810800  | -0.4511300 | 0.0271505  |
| H | 3.4222648  | -0.2430844 | 0.0439150  |
| H | 4.4318898  | -1.6951537 | 0.0559161  |
| O | -3.3576520 | -1.4474370 | 0.0028757  |
| H | -3.2344618 | -4.0674379 | -0.0473167 |
| H | -1.0127163 | -5.2709604 | -0.0620257 |
| H | -1.0148327 | 3.8925783  | -0.0213112 |
| H | 1.0127163  | 5.2709604  | -0.0620257 |
| H | 3.2344618  | 4.0674379  | -0.0473167 |

**DDAA03**

44

|   |            |            |            |
|---|------------|------------|------------|
| C | -3.8849678 | 3.7567598  | 0.8396547  |
| C | -4.9073648 | 2.8341448  | 1.0349610  |
| C | -2.6100947 | 3.3060884  | 0.4248711  |
| C | -4.6270886 | 1.4715057  | 0.7816800  |
| C | -2.4083433 | 1.8922199  | 0.2296740  |
| N | -3.4388725 | 1.0142864  | 0.3956363  |
| C | -1.4965162 | 4.1614528  | 0.1704678  |
| C | -0.2914463 | 3.6279451  | -0.2140052 |
| C | -0.1679390 | 2.1921703  | -0.3307840 |
| N | -1.2091709 | 1.3659224  | -0.1331099 |
| N | 1.0344942  | 1.5984023  | -0.6124257 |
| C | 2.2049820  | 2.2649696  | -1.0724020 |
| N | 3.2911112  | 1.4490061  | -1.0752034 |
| O | 2.2134723  | 3.4376327  | -1.4487797 |
| N | 3.4476255  | -1.0076849 | 0.3391677  |
| C | 2.4133249  | -1.8880132 | 0.2146095  |

|   |            |            |            |
|---|------------|------------|------------|
| C | 4.6441717  | -1.4577941 | 0.7074022  |
| C | 2.6190481  | -3.2977425 | 0.4344051  |
| C | 4.9298220  | -2.8151798 | 0.9819780  |
| C | 3.9029091  | -3.7408072 | 0.8291678  |
| N | 1.2064479  | -1.3684693 | -0.1318648 |
| C | 0.1608045  | -2.1979032 | -0.2888835 |
| C | 0.2863630  | -3.6309751 | -0.1446544 |
| C | 1.4996843  | -4.1573567 | 0.2233870  |
| N | -1.0474259 | -1.6093413 | -0.5561765 |
| C | -2.2266667 | -2.2845286 | -0.9797726 |
| N | -3.3133636 | -1.4694006 | -0.9740796 |
| H | -3.3390499 | -0.5628181 | -0.4464740 |
| H | -4.1855102 | -1.9225505 | -1.2431024 |
| O | -2.2418096 | -3.4635645 | -1.3353333 |
| H | -1.0827650 | -0.5656365 | -0.4470452 |
| H | 4.1578740  | 1.8975394  | -1.3683488 |
| H | 3.3279766  | 0.5533086  | -0.5299643 |
| H | 1.0726114  | 0.5570999  | -0.4832011 |
| H | -4.0497751 | 4.8344036  | 0.9994148  |
| H | -5.9107812 | 3.1427489  | 1.3602839  |
| H | -5.4249559 | 0.7151675  | 0.8950955  |
| H | -1.6123992 | 5.2502857  | 0.2897485  |
| H | 0.5884205  | 4.2398142  | -0.4431207 |
| H | 5.4445071  | -0.6998042 | 0.7877125  |
| H | 5.9403598  | -3.1178203 | 1.2904408  |
| H | 4.0709470  | -4.8150570 | 1.0073091  |
| H | -0.5985895 | -4.2468524 | -0.3409434 |
| H | 1.6179390  | -5.2435742 | 0.3626072  |

#### DDAA04

40

|   |            |            |           |
|---|------------|------------|-----------|
| C | -4.0076986 | 3.2290573  | 0.0000000 |
| C | -3.5053168 | 4.5418992  | 0.0000000 |
| N | -3.2289840 | 2.1542907  | 0.0000000 |
| C | -2.1469249 | 4.7390285  | 0.0000000 |
| C | -1.9120046 | 2.3553588  | 0.0000000 |
| N | -1.3391743 | 3.6499296  | 0.0000000 |
| N | -0.9594222 | 1.4387236  | 0.0000000 |
| C | 0.0281624  | 3.4937098  | 0.0000000 |
| C | 0.2288217  | 2.1191731  | 0.0000000 |
| N | 1.3806276  | 1.3917520  | 0.0000000 |
| C | 2.6517048  | 1.9467068  | 0.0000000 |
| N | 3.6443226  | 1.0157420  | 0.0000000 |
| O | 2.8483979  | 3.1558699  | 0.0000000 |
| H | -5.0766605 | 3.0504221  | 0.0000000 |
| H | -4.1728865 | 5.3911215  | 0.0000000 |
| H | 0.7238840  | 4.3104250  | 0.0000000 |
| C | 4.0076986  | -3.2290573 | 0.0000000 |
| N | 3.2289840  | -2.1542907 | 0.0000000 |
| C | 3.5053168  | -4.5418992 | 0.0000000 |
| C | 1.9120046  | -2.3553588 | 0.0000000 |
| C | 2.1469249  | -4.7390285 | 0.0000000 |
| N | 1.3391743  | -3.6499296 | 0.0000000 |
| N | 0.9594222  | -1.4387236 | 0.0000000 |
| C | -0.0281624 | -3.4937098 | 0.0000000 |
| C | -0.2288217 | -2.1191731 | 0.0000000 |

|   |            |            |           |
|---|------------|------------|-----------|
| N | -1.3806276 | -1.3917520 | 0.0000000 |
| C | -2.6517048 | -1.9467068 | 0.0000000 |
| N | -3.6443226 | -1.0157420 | 0.0000000 |
| O | -2.8483979 | -3.1558699 | 0.0000000 |
| H | 5.0766605  | -3.0504221 | 0.0000000 |
| H | 4.1728865  | -5.3911215 | 0.0000000 |
| H | 1.6684682  | -5.7080849 | 0.0000000 |
| H | -0.7238840 | -4.3104250 | 0.0000000 |
| H | -1.6684682 | 5.7080849  | 0.0000000 |
| H | 1.2582241  | 0.3650296  | 0.0000000 |
| H | 3.4906373  | 0.0118556  | 0.0000000 |
| H | 4.5854159  | 1.3659833  | 0.0000000 |
| H | -3.4906373 | -0.0118556 | 0.0000000 |
| H | -4.5854159 | -1.3659833 | 0.0000000 |
| H | -1.2582241 | -0.3650296 | 0.0000000 |

**DDAA05**

38

|   |            |            |            |
|---|------------|------------|------------|
| S | -2.3906043 | 2.2719308  | 0.6013863  |
| O | -3.2901753 | 1.3733313  | 1.3007449  |
| O | -2.3165679 | 3.6401578  | 1.0829363  |
| N | -0.9531313 | 1.5241564  | 0.5439539  |
| C | 0.1509392  | 2.2280299  | 0.2906138  |
| N | 0.2195346  | 3.5407439  | 0.0889844  |
| H | -0.5863392 | 4.0925016  | 0.3575179  |
| H | 1.1568008  | 3.9207482  | -0.0501658 |
| N | 1.3076496  | 1.4964852  | 0.2213638  |
| C | 2.5874961  | 2.0393220  | 0.0253852  |
| H | 1.1973362  | 0.4889715  | 0.3899489  |
| N | 3.5848274  | 1.1334311  | 0.0999505  |
| H | 3.4744514  | 0.2398709  | 0.5853896  |
| H | 4.5100144  | 1.5290883  | 0.0588417  |
| O | 2.7752060  | 3.2270190  | -0.2325869 |
| N | -3.5848274 | -1.1334311 | 0.0999505  |
| C | -2.5874961 | -2.0393220 | 0.0253852  |
| H | -4.5100144 | -1.5290883 | 0.0588417  |
| H | -3.4744514 | -0.2398709 | 0.5853896  |
| N | -1.3076496 | -1.4964852 | 0.2213638  |
| C | -0.1509392 | -2.2280299 | 0.2906138  |
| H | -1.1973362 | -0.4889715 | 0.3899489  |
| N | 0.9531313  | -1.5241564 | 0.5439539  |
| N | -0.2195346 | -3.5407439 | 0.0889844  |
| H | 0.5863392  | -4.0925016 | 0.3575179  |
| H | -1.1568008 | -3.9207482 | -0.0501658 |
| S | 2.3906043  | -2.2719308 | 0.6013863  |
| O | 3.2901753  | -1.3733313 | 1.3007449  |
| O | 2.3165679  | -3.6401578 | 1.0829363  |
| O | -2.7752060 | -3.2270190 | -0.2325869 |
| C | 2.9215116  | -2.3382055 | -1.0994095 |
| H | 2.9925652  | -1.3228068 | -1.4849029 |
| H | 2.1979973  | -2.9219116 | -1.6670245 |
| H | 3.8957798  | -2.8252151 | -1.1113118 |
| C | -2.9215116 | 2.3382055  | -1.0994095 |
| H | -3.8957798 | 2.8252151  | -1.1113118 |
| H | -2.9925652 | 1.3228068  | -1.4849029 |
| H | -2.1979973 | 2.9219116  | -1.6670245 |



**DDAA06**

38

|   |            |            |           |
|---|------------|------------|-----------|
| N | 1.5063512  | -1.1103757 | 0.0000000 |
| C | 2.1722103  | -2.2911404 | 0.0000000 |
| C | 3.5867416  | -2.2734164 | 0.0000000 |
| C | 4.2417543  | -1.0680081 | 0.0000000 |
| C | 3.3626153  | 2.5472057  | 0.0000000 |
| C | 1.9180662  | 2.4354621  | 0.0000000 |
| N | 1.3404621  | 1.1873400  | 0.0000000 |
| C | 2.1277164  | 0.1169531  | 0.0000000 |
| C | 3.5442119  | 0.1500279  | 0.0000000 |
| C | 4.1432105  | 1.4379137  | 0.0000000 |
| N | 1.4531482  | -3.4114259 | 0.0000000 |
| H | 4.1200252  | -3.2138128 | 0.0000000 |
| H | 5.3264340  | -1.0472450 | 0.0000000 |
| H | 0.3977119  | -3.4097765 | 0.0000000 |
| H | 5.2256056  | 1.5139348  | 0.0000000 |
| H | 3.7769621  | 3.5461449  | 0.0000000 |
| O | 1.2008732  | 3.4646497  | 0.0000000 |
| H | 1.9455360  | -4.2875749 | 0.0000000 |
| H | 0.4523327  | -1.1216411 | 0.0000000 |
| N | -1.5063512 | 1.1103757  | 0.0000000 |
| C | -2.1722103 | 2.2911404  | 0.0000000 |
| C | -3.5867416 | 2.2734164  | 0.0000000 |
| C | -4.2417543 | 1.0680081  | 0.0000000 |
| C | -3.3626153 | -2.5472057 | 0.0000000 |
| C | -1.9180662 | -2.4354621 | 0.0000000 |
| N | -1.3404621 | -1.1873400 | 0.0000000 |
| C | -2.1277164 | -0.1169531 | 0.0000000 |
| C | -3.5442119 | -0.1500279 | 0.0000000 |
| C | -4.1432105 | -1.4379137 | 0.0000000 |
| N | -1.4531482 | 3.4114259  | 0.0000000 |
| H | -4.1200252 | 3.2138128  | 0.0000000 |
| H | -5.3264340 | 1.0472450  | 0.0000000 |
| H | -0.3977119 | 3.4097765  | 0.0000000 |
| H | -5.2256056 | -1.5139348 | 0.0000000 |
| H | -3.7769621 | -3.5461449 | 0.0000000 |
| O | -1.2008732 | -3.4646497 | 0.0000000 |
| H | -1.9455360 | 4.2875749  | 0.0000000 |
| H | -0.4523327 | 1.1216411  | 0.0000000 |

**DDAA07**

46

|   |            |            |            |
|---|------------|------------|------------|
| H | 4.8479511  | -2.8567145 | 0.9228588  |
| C | 3.8944425  | -3.3873159 | 0.7359036  |
| N | 2.8011630  | -2.4589794 | 0.5281782  |
| C | 2.4137346  | -2.1066319 | -0.7053687 |
| O | 2.9253952  | -2.5473524 | -1.7490709 |
| N | 1.3467597  | -1.1806727 | -0.7300305 |
| C | 0.7710671  | -0.6816744 | -1.8667281 |
| N | -0.2209975 | 0.1818470  | -1.7681536 |
| C | -0.8064284 | 0.6855768  | -2.9235082 |
| O | -1.7445855 | 1.4951466  | -2.8563121 |
| N | 1.2635117  | -1.1134733 | -3.0638204 |
| C | 0.7426027  | -0.6596561 | -4.2532793 |

17

|   |            |            |            |
|---|------------|------------|------------|
| C | -0.2845832 | 0.2334125  | -4.2075433 |
| C | 1.3717260  | -1.2060822 | -5.5006370 |
| H | 3.6672356  | -4.0191621 | 1.6104720  |
| H | 4.0135679  | -4.0173484 | -0.1587801 |
| H | 2.3545319  | -2.0376733 | 1.3748124  |
| H | 0.9399581  | -0.8240057 | 0.1711376  |
| H | 2.0495164  | -1.7961777 | -2.9740482 |
| H | -0.7398706 | 0.6292164  | -5.1162302 |
| H | 2.4500561  | -0.9638438 | -5.5296780 |
| H | 0.8897024  | -0.7836067 | -6.3950543 |
| H | 1.2779184  | -2.3072318 | -5.5325876 |
| H | -4.8479511 | 2.8567145  | -0.9228588 |
| C | -3.8944425 | 3.3873159  | -0.7359036 |
| N | -2.8011630 | 2.4589794  | -0.5281782 |
| C | -2.4137346 | 2.1066319  | 0.7053687  |
| O | -2.9253952 | 2.5473524  | 1.7490709  |
| N | -1.3467597 | 1.1806727  | 0.7300305  |
| C | -0.7710671 | 0.6816744  | 1.8667281  |
| N | 0.2209975  | -0.1818470 | 1.7681536  |
| C | 0.8064284  | -0.6855768 | 2.9235082  |
| O | 1.7445855  | -1.4951466 | 2.8563121  |
| N | -1.2635117 | 1.1134733  | 3.0638204  |
| C | -0.7426027 | 0.6596561  | 4.2532793  |
| C | 0.2845832  | -0.2334125 | 4.2075433  |
| C | -1.3717260 | 1.2060822  | 5.5006370  |
| H | -3.6672356 | 4.0191621  | -1.6104720 |
| H | -4.0135679 | 4.0173484  | 0.1587801  |
| H | -2.3545319 | 2.0376733  | -1.3748124 |
| H | -0.9399581 | 0.8240057  | -0.1711376 |
| H | -2.0495164 | 1.7961777  | 2.9740482  |
| H | 0.7398706  | -0.6292164 | 5.1162302  |
| H | -2.4500561 | 0.9638438  | 5.5296780  |
| H | -0.8897024 | 0.7836067  | 6.3950543  |
| H | -1.2779184 | 2.3072318  | 5.5325876  |

#### DDAA08

50

|   |            |            |            |
|---|------------|------------|------------|
| C | -2.3795454 | 6.1873472  | 0.0000000  |
| C | -3.6350620 | 5.5527593  | 0.0000000  |
| C | -3.6731055 | 4.1606264  | 0.0000000  |
| N | -1.2143491 | 5.5406775  | 0.0000000  |
| C | -1.2709523 | 4.2050976  | 0.0000000  |
| C | -2.4624376 | 3.4556297  | 0.0000000  |
| N | -0.0802832 | 3.5136225  | 0.0000000  |
| C | -2.3873151 | 1.9810048  | 0.0000000  |
| C | -0.0526811 | 2.1555345  | 0.0000000  |
| N | -1.1424358 | 1.3951882  | 0.0000000  |
| N | 1.1677484  | 1.5489476  | 0.0000000  |
| C | 2.4087824  | 2.2346679  | 0.0000000  |
| N | 3.4781070  | 1.4286761  | 0.0000000  |
| O | 2.4809811  | 3.4702680  | 0.0000000  |
| O | -3.4254799 | 1.3054176  | 0.0000000  |
| C | 4.8121525  | 1.9974864  | 0.0000000  |
| H | 4.9788008  | 2.6257950  | -0.8929561 |
| H | 5.5326475  | 1.1657652  | 0.0000000  |
| H | 4.9788008  | 2.6257950  | 0.8929561  |
| C | 2.4624376  | -3.4556297 | 0.0000000  |

|   |            |            |            |
|---|------------|------------|------------|
| C | 1.2709523  | -4.2050976 | 0.0000000  |
| C | 3.6731055  | -4.1606264 | 0.0000000  |
| N | 1.2143491  | -5.5406775 | 0.0000000  |
| C | 3.6350620  | -5.5527593 | 0.0000000  |
| C | 2.3795454  | -6.1873472 | 0.0000000  |
| C | 2.3873151  | -1.9810048 | 0.0000000  |
| N | 0.0802832  | -3.5136225 | 0.0000000  |
| C | 0.0526811  | -2.1555345 | 0.0000000  |
| N | 1.1424358  | -1.3951882 | 0.0000000  |
| N | -1.1677484 | -1.5489476 | 0.0000000  |
| C | -2.4087824 | -2.2346679 | 0.0000000  |
| N | -3.4781070 | -1.4286761 | 0.0000000  |
| C | -4.8121525 | -1.9974864 | 0.0000000  |
| H | -4.9788008 | -2.6257950 | -0.8929561 |
| H | -5.5326475 | -1.1657652 | 0.0000000  |
| H | -4.9788008 | -2.6257950 | 0.8929561  |
| O | -2.4809811 | -3.4702680 | 0.0000000  |
| O | 3.4254799  | -1.3054176 | 0.0000000  |
| H | -4.5515092 | 6.1483217  | 0.0000000  |
| H | -4.6089026 | 3.5957359  | 0.0000000  |
| H | -2.3161844 | 7.2823337  | 0.0000000  |
| H | 4.6089026  | -3.5957359 | 0.0000000  |
| H | 4.5515092  | -6.1483217 | 0.0000000  |
| H | 2.3161844  | -7.2823337 | 0.0000000  |
| H | -0.8487800 | -3.9854879 | 0.0000000  |
| H | -1.1500020 | -0.5005675 | 0.0000000  |
| H | -3.3796809 | -0.3918097 | 0.0000000  |
| H | 1.1500020  | 0.5005675  | 0.0000000  |
| H | 3.3796809  | 0.3918097  | 0.0000000  |
| H | 0.8487800  | 3.9854879  | 0.0000000  |

#### DADA01

38

|   |            |            |           |
|---|------------|------------|-----------|
| C | 0.9794353  | 4.2796257  | 0.0000000 |
| N | -0.1584407 | 3.5720738  | 0.0000000 |
| C | 2.2229912  | 3.6949296  | 0.0000000 |
| C | -0.0320073 | 2.2404277  | 0.0000000 |
| C | 2.2492717  | 2.2884329  | 0.0000000 |
| N | 1.1163299  | 1.5596814  | 0.0000000 |
| N | 3.4064031  | 1.5556922  | 0.0000000 |
| C | 4.7027775  | 2.0284253  | 0.0000000 |
| O | 5.0474968  | 3.1902662  | 0.0000000 |
| N | -1.1898964 | 1.4927503  | 0.0000000 |
| C | -2.5022605 | 1.9640371  | 0.0000000 |
| O | -3.4342575 | 1.1738647  | 0.0000000 |
| H | 5.4160457  | 1.1911271  | 0.0000000 |
| H | 0.8673746  | 5.3574152  | 0.0000000 |
| H | 3.1376113  | 4.2631216  | 0.0000000 |
| H | -1.0994941 | 0.4705564  | 0.0000000 |
| H | 3.3089875  | 0.5244519  | 0.0000000 |
| O | -2.6811431 | 3.2655575  | 0.0000000 |
| H | -1.7679406 | 3.7060051  | 0.0000000 |
| O | 3.4342575  | -1.1738647 | 0.0000000 |
| C | 2.5022605  | -1.9640371 | 0.0000000 |
| N | 1.1898964  | -1.4927503 | 0.0000000 |
| O | 2.6811431  | -3.2655575 | 0.0000000 |

|   |            |            |           |
|---|------------|------------|-----------|
| C | 0.0320073  | -2.2404277 | 0.0000000 |
| N | -1.1163299 | -1.5596814 | 0.0000000 |
| N | 0.1584407  | -3.5720738 | 0.0000000 |
| H | 1.7679406  | -3.7060051 | 0.0000000 |
| C | -2.2492717 | -2.2884329 | 0.0000000 |
| N | -3.4064031 | -1.5556922 | 0.0000000 |
| C | -0.9794353 | -4.2796257 | 0.0000000 |
| C | -2.2229912 | -3.6949296 | 0.0000000 |
| C | -4.7027775 | -2.0284253 | 0.0000000 |
| H | -5.4160457 | -1.1911271 | 0.0000000 |
| O | -5.0474968 | -3.1902662 | 0.0000000 |
| H | -0.8673746 | -5.3574152 | 0.0000000 |
| H | -3.1376113 | -4.2631216 | 0.0000000 |
| H | 1.0994941  | -0.4705564 | 0.0000000 |
| H | -3.3089875 | -0.5244519 | 0.0000000 |

## DADA02

36

|   |            |            |           |
|---|------------|------------|-----------|
| C | 4.1549460  | 1.4904225  | 0.0000000 |
| C | 3.3991125  | 2.6287686  | 0.0000000 |
| N | 3.6275654  | 0.2537732  | 0.0000000 |
| C | 1.9909345  | 2.4627565  | 0.0000000 |
| C | 2.2917135  | 0.1940943  | 0.0000000 |
| N | 1.4422803  | 1.2296952  | 0.0000000 |
| N | 1.1680746  | 3.5160620  | 0.0000000 |
| N | 1.6871920  | -1.0496210 | 0.0000000 |
| C | 2.2685982  | -2.3146056 | 0.0000000 |
| O | 1.5483926  | -3.3198603 | 0.0000000 |
| N | 3.6088659  | -2.3843501 | 0.0000000 |
| H | 5.2388486  | 1.5399923  | 0.0000000 |
| H | 1.5604270  | 4.4406410  | 0.0000000 |
| H | 0.1429917  | 3.4040035  | 0.0000000 |
| H | 4.1387663  | -1.5124844 | 0.0000000 |
| H | 4.0188749  | -3.3012571 | 0.0000000 |
| H | 0.6622370  | -1.0557211 | 0.0000000 |
| N | -1.4422803 | -1.2296952 | 0.0000000 |
| C | -2.2917135 | -0.1940943 | 0.0000000 |
| C | -1.9909345 | -2.4627565 | 0.0000000 |
| N | -3.6275654 | -0.2537732 | 0.0000000 |
| C | -3.3991125 | -2.6287686 | 0.0000000 |
| C | -4.1549460 | -1.4904225 | 0.0000000 |
| N | -1.1680746 | -3.5160620 | 0.0000000 |
| N | -1.6871920 | 1.0496210  | 0.0000000 |
| C | -2.2685982 | 2.3146056  | 0.0000000 |
| O | -1.5483926 | 3.3198603  | 0.0000000 |
| N | -3.6088659 | 2.3843501  | 0.0000000 |
| H | -5.2388486 | -1.5399923 | 0.0000000 |
| H | -0.6622370 | 1.0557211  | 0.0000000 |
| H | -0.1429917 | -3.4040035 | 0.0000000 |
| H | -1.5604270 | -4.4406410 | 0.0000000 |
| H | -4.1387663 | 1.5124844  | 0.0000000 |
| H | -4.0188749 | 3.3012571  | 0.0000000 |
| H | 3.8473298  | 3.6130484  | 0.0000000 |
| H | -3.8473298 | -3.6130484 | 0.0000000 |

**DADA03**

42

|   |            |            |           |
|---|------------|------------|-----------|
| C | 1.1797795  | 4.2305816  | 0.0000000 |
| N | -0.0381453 | 3.6766595  | 0.0000000 |
| C | 2.3905840  | 3.5593943  | 0.0000000 |
| C | 0.0176829  | 2.3375075  | 0.0000000 |
| C | 2.3301813  | 2.1466270  | 0.0000000 |
| N | 1.1140092  | 1.5559767  | 0.0000000 |
| N | 3.4338340  | 1.4054181  | 0.0000000 |
| N | -1.1769829 | 1.6336069  | 0.0000000 |
| C | -2.4832164 | 2.1072209  | 0.0000000 |
| O | -3.4300755 | 1.3123074  | 0.0000000 |
| N | -2.6679888 | 3.4386452  | 0.0000000 |
| N | -1.1140092 | -1.5559767 | 0.0000000 |
| C | -2.3301813 | -2.1466270 | 0.0000000 |
| C | -0.0176829 | -2.3375075 | 0.0000000 |
| C | -2.3905840 | -3.5593943 | 0.0000000 |
| N | 0.0381453  | -3.6766595 | 0.0000000 |
| C | -1.1797795 | -4.2305816 | 0.0000000 |
| N | 1.1769829  | -1.6336069 | 0.0000000 |
| C | 2.4832164  | -2.1072209 | 0.0000000 |
| O | 3.4300755  | -1.3123074 | 0.0000000 |
| N | 2.6679888  | -3.4386452 | 0.0000000 |
| N | -3.4338340 | -1.4054181 | 0.0000000 |
| N | 1.5148431  | 5.5617892  | 0.0000000 |
| N | 3.4562195  | 4.4415202  | 0.0000000 |
| C | 2.8962787  | 5.6223993  | 0.0000000 |
| H | 3.4188263  | 6.5659703  | 0.0000000 |
| N | -3.4562195 | -4.4415202 | 0.0000000 |
| N | -1.5148431 | -5.5617892 | 0.0000000 |
| C | -2.8962787 | -5.6223993 | 0.0000000 |
| H | -3.4188263 | -6.5659703 | 0.0000000 |
| H | -1.8523241 | 4.0459564  | 0.0000000 |
| H | -3.6178203 | 3.7648353  | 0.0000000 |
| H | -1.0956850 | 0.6132933  | 0.0000000 |
| H | 0.8740915  | 6.3385409  | 0.0000000 |
| H | 4.3178360  | 1.8860201  | 0.0000000 |
| H | 3.4013258  | 0.3752859  | 0.0000000 |
| H | 1.0956850  | -0.6132933 | 0.0000000 |
| H | -3.4013258 | -0.3752859 | 0.0000000 |
| H | -4.3178360 | -1.8860201 | 0.0000000 |
| H | -0.8740915 | -6.3385409 | 0.0000000 |
| H | 1.8523241  | -4.0459564 | 0.0000000 |
| H | 3.6178203  | -3.7648353 | 0.0000000 |

**DADA04**

76

|   |            |            |            |
|---|------------|------------|------------|
| C | -5.5136815 | 1.7413585  | -2.7363477 |
| C | -6.8372688 | 1.9279270  | -3.1157464 |
| C | -5.0954784 | 0.5026518  | -2.2434239 |
| C | -7.7500303 | 0.8835043  | -3.0005818 |
| C | -6.0122313 | -0.5453258 | -2.1403048 |
| C | -7.3353493 | -0.3530216 | -2.5123815 |

|   |            |            |            |
|---|------------|------------|------------|
| C | -3.6893733 | 0.2303840  | -1.8416953 |
| N | -2.9991169 | 1.3013517  | -1.3960124 |
| N | -1.6868159 | 1.2129970  | -1.0023268 |
| C | -1.1344362 | 2.3696380  | -0.5870748 |
| C | 0.2735543  | 2.2002154  | -0.0496438 |
| N | 0.6845930  | 3.2955523  | 0.5884712  |
| N | 1.9136973  | 3.3917433  | 1.1864439  |
| C | 2.2432505  | 4.6448720  | 1.6313276  |
| C | 3.5174039  | 4.8007747  | 2.3802359  |
| C | 4.0097632  | 6.1020355  | 2.5142901  |
| C | 4.2055532  | 3.7365838  | 2.9675292  |
| C | 5.1859677  | 6.3348174  | 3.2125848  |
| C | 5.3797528  | 3.9767184  | 3.6721993  |
| C | 5.8740030  | 5.2718362  | 3.7931008  |
| O | -3.1839135 | -0.8934770 | -1.8940363 |
| O | -1.7180766 | 3.4520659  | -0.6398937 |
| O | 0.9283074  | 1.1633566  | -0.1780850 |
| O | 1.4923572  | 5.5875118  | 1.3882602  |
| H | -7.1536764 | 2.8857673  | -3.5094686 |
| H | -8.7814815 | 1.0319762  | -3.2961166 |
| H | -4.8052401 | 2.5524448  | -2.8600787 |
| H | -5.6738728 | -1.5006357 | -1.7620723 |
| H | -8.0433574 | -1.1676294 | -2.4213544 |
| H | 3.4510400  | 6.9123424  | 2.0649367  |
| H | 5.5654784  | 7.3448437  | 3.3082758  |
| H | 6.7892721  | 5.4539325  | 4.3435876  |
| H | 3.8315937  | 2.7242046  | 2.8909137  |
| H | 5.9038479  | 3.1479362  | 4.1328747  |
| C | -3.5174039 | -4.8007747 | -2.3802359 |
| C | -4.2055532 | -3.7365838 | -2.9675292 |
| C | -4.0097632 | -6.1020355 | -2.5142901 |
| C | -5.3797528 | -3.9767184 | -3.6721993 |
| C | -5.1859677 | -6.3348174 | -3.2125848 |
| C | -5.8740030 | -5.2718362 | -3.7931008 |
| C | -2.2432505 | -4.6448720 | -1.6313276 |
| N | -1.9136973 | -3.3917433 | -1.1864439 |
| N | -0.6845930 | -3.2955523 | -0.5884712 |
| C | -0.2735543 | -2.2002154 | 0.0496438  |
| C | 1.1344362  | -2.3696380 | 0.5870748  |
| N | 1.6868159  | -1.2129970 | 1.0023268  |
| N | 2.9991169  | -1.3013517 | 1.3960124  |
| C | 3.6893733  | -0.2303840 | 1.8416953  |
| O | -1.4923572 | -5.5875118 | -1.3882602 |
| O | -0.9283074 | -1.1633566 | 0.1780850  |
| O | 1.7180766  | -3.4520659 | 0.6398937  |
| O | 3.1839135  | 0.8934770  | 1.8940363  |
| C | 5.0954784  | -0.5026518 | 2.2434239  |
| C | 6.0122313  | 0.5453258  | 2.1403048  |
| C | 5.5136815  | -1.7413585 | 2.7363477  |
| C | 7.3353493  | 0.3530216  | 2.5123815  |
| C | 6.8372688  | -1.9279270 | 3.1157464  |
| C | 7.7500303  | -0.8835043 | 3.0005818  |
| H | -5.9038479 | -3.1479362 | -4.1328747 |
| H | -6.7892721 | -5.4539325 | -4.3435876 |
| H | -3.4510400 | -6.9123424 | -2.0649367 |
| H | -5.5654784 | -7.3448437 | -3.3082758 |
| H | -3.8315937 | -2.7242046 | -2.8909137 |

|   |            |            |            |
|---|------------|------------|------------|
| H | 5.6738728  | 1.5006357  | 1.7620723  |
| H | 8.0433574  | 1.1676294  | 2.4213544  |
| H | 8.7814815  | -1.0319762 | 3.2961166  |
| H | 4.8052401  | -2.5524448 | 2.8600787  |
| H | 7.1536764  | -2.8857673 | 3.5094686  |
| H | -3.3783550 | 2.2337978  | -1.2776497 |
| H | -1.3360022 | 0.2812256  | -0.7310595 |
| H | 0.1591923  | 4.1677864  | 0.5847878  |
| H | 2.3954894  | 2.5090493  | 1.3682017  |
| H | -2.3954894 | -2.5090493 | -1.3682017 |
| H | -0.1591923 | -4.1677864 | -0.5847878 |
| H | 1.3360022  | -0.2812256 | 0.7310595  |
| H | 3.3783550  | -2.2337978 | 1.2776497  |

### DADA05

72

|   |            |            |            |
|---|------------|------------|------------|
| C | -2.7912620 | 4.8735013  | -0.4647286 |
| C | -3.9729554 | 4.0544627  | -0.3126676 |
| C | -1.5279812 | 4.1318074  | -0.3002255 |
| C | -3.8929752 | 2.7118591  | -0.0579800 |
| C | -1.5202850 | 2.7516114  | -0.0374297 |
| N | -2.7118763 | 2.0665294  | 0.0795690  |
| C | -0.3162750 | 4.8182205  | -0.3990061 |
| C | 0.8868248  | 4.1613418  | -0.2390321 |
| C | 0.9056083  | 2.7592804  | 0.0216118  |
| C | -0.2986588 | 2.0833333  | 0.1118366  |
| C | 2.1347267  | 1.9285866  | 0.2197490  |
| N | 3.2902738  | 2.6005425  | 0.2793766  |
| N | 4.4971118  | 1.9867517  | 0.4778073  |
| C | 5.5959467  | 2.7938957  | 0.4567905  |
| C | 6.9119627  | 2.1013673  | 0.6900987  |
| H | 6.8041899  | 1.0239917  | 0.8021181  |
| H | 7.3694660  | 2.5207044  | 1.5876347  |
| H | 7.5720446  | 2.3210042  | -0.1500503 |
| O | 2.0793677  | 0.6931998  | 0.3467732  |
| O | 5.4771689  | 4.0000545  | 0.2632507  |
| O | -2.8263688 | 6.0833928  | -0.7005309 |
| C | -5.0984122 | 1.8576091  | 0.1379912  |
| O | -6.2656195 | 2.3344471  | -0.3166641 |
| O | -5.0562291 | 0.7802326  | 0.6869591  |
| H | -4.9265548 | 4.5662882  | -0.3590457 |
| H | -0.3745903 | 5.8783605  | -0.6015519 |
| H | -0.2888047 | 1.0217377  | 0.3119123  |
| O | 2.0836957  | 4.8032673  | -0.3225954 |
| N | 2.7118763  | -2.0665294 | 0.0795690  |
| C | 1.5202850  | -2.7516114 | -0.0374297 |
| C | 3.8929752  | -2.7118591 | -0.0579800 |
| C | 1.5279812  | -4.1318074 | -0.3002255 |
| C | 3.9729554  | -4.0544627 | -0.3126676 |
| C | 2.7912620  | -4.8735013 | -0.4647286 |
| C | 5.0984122  | -1.8576091 | 0.1379912  |
| O | 6.2656195  | -2.3344471 | -0.3166641 |
| O | 5.0562291  | -0.7802326 | 0.6869591  |
| C | 0.2986588  | -2.0833333 | 0.1118366  |
| C | -0.9056083 | -2.7592804 | 0.0216118  |

|   |            |            |            |
|---|------------|------------|------------|
| C | -0.8868248 | -4.1613418 | -0.2390321 |
| C | 0.3162750  | -4.8182205 | -0.3990061 |
| C | -2.1347267 | -1.9285866 | 0.2197490  |
| N | -3.2902738 | -2.6005425 | 0.2793766  |
| N | -4.4971118 | -1.9867517 | 0.4778073  |
| C | -5.5959467 | -2.7938957 | 0.4567905  |
| C | -6.9119627 | -2.1013673 | 0.6900987  |
| O | -5.4771689 | -4.0000545 | 0.2632507  |
| O | -2.0793677 | -0.6931998 | 0.3467732  |
| H | 4.9265548  | -4.5662882 | -0.3590457 |
| H | 0.3745903  | -5.8783605 | -0.6015519 |
| H | 0.2888047  | -1.0217377 | 0.3119123  |
| O | -2.0836957 | -4.8032673 | -0.3225954 |
| C | -2.0948841 | -6.2117068 | -0.5644555 |
| H | -1.6322650 | -6.4371516 | -1.5275838 |
| H | -3.1455202 | -6.4879466 | -0.5752644 |
| H | -1.5710384 | -6.7407837 | 0.2344092  |
| C | 2.0948841  | 6.2117068  | -0.5644555 |
| H | 1.6322650  | 6.4371516  | -1.5275838 |
| H | 3.1455202  | 6.4879466  | -0.5752644 |
| H | 1.5710384  | 6.7407837  | 0.2344092  |
| H | -2.6941926 | 1.0536200  | 0.2471799  |
| H | 3.3593461  | 3.6077431  | 0.1412330  |
| H | 4.4979989  | 0.9803024  | 0.6212394  |
| H | -4.4979989 | -0.9803024 | 0.6212394  |
| H | -3.3593461 | -3.6077431 | 0.1412330  |
| H | 2.6941926  | -1.0536200 | 0.2471799  |
| H | -6.1180800 | 3.1678682  | -0.7887285 |
| H | 6.1180800  | -3.1678682 | -0.7887285 |
| H | -6.8041899 | -1.0239917 | 0.8021181  |
| H | -7.3694660 | -2.5207044 | 1.5876347  |
| H | -7.5720446 | -2.3210042 | -0.1500503 |
| O | 2.8263688  | -6.0833928 | -0.7005309 |

#### DADA06

40

|   |            |            |           |
|---|------------|------------|-----------|
| C | 1.0152836  | 4.3255086  | 0.0000000 |
| N | -0.1406299 | 3.6501668  | 0.0000000 |
| C | 2.2488753  | 3.7191610  | 0.0000000 |
| C | -0.0401174 | 2.3171815  | 0.0000000 |
| C | 2.2429087  | 2.3142826  | 0.0000000 |
| N | 1.0974774  | 1.6094095  | 0.0000000 |
| N | 3.3893313  | 1.5596491  | 0.0000000 |
| C | 4.6902465  | 2.0063334  | 0.0000000 |
| O | 5.0658438  | 3.1605825  | 0.0000000 |
| N | -1.1997261 | 1.5662250  | 0.0000000 |
| C | -2.5275576 | 1.9873385  | 0.0000000 |
| O | -3.4299841 | 1.1417363  | 0.0000000 |
| H | 5.3863987  | 1.1539695  | 0.0000000 |
| H | 0.9299469  | 5.4067309  | 0.0000000 |
| H | 3.1752012  | 4.2680398  | 0.0000000 |
| H | -1.0896542 | 0.5496190  | 0.0000000 |
| H | 3.2753227  | 0.5285757  | 0.0000000 |
| N | -2.7667894 | 3.3055080  | 0.0000000 |
| O | 3.4299841  | -1.1417363 | 0.0000000 |



|   |            |            |           |
|---|------------|------------|-----------|
| C | 2.5275576  | -1.9873385 | 0.0000000 |
| N | 1.1997261  | -1.5662250 | 0.0000000 |
| N | 2.7667894  | -3.3055080 | 0.0000000 |
| C | 0.0401174  | -2.3171815 | 0.0000000 |
| N | -1.0974774 | -1.6094095 | 0.0000000 |
| N | 0.1406299  | -3.6501668 | 0.0000000 |
| C | -2.2429087 | -2.3142826 | 0.0000000 |
| N | -3.3893313 | -1.5596491 | 0.0000000 |
| C | -1.0152836 | -4.3255086 | 0.0000000 |
| C | -2.2488753 | -3.7191610 | 0.0000000 |
| C | -4.6902465 | -2.0063334 | 0.0000000 |
| H | -5.3863987 | -1.1539695 | 0.0000000 |
| O | -5.0658438 | -3.1605825 | 0.0000000 |
| H | -0.9299469 | -5.4067309 | 0.0000000 |
| H | -3.1752012 | -4.2680398 | 0.0000000 |
| H | 1.0896542  | -0.5496190 | 0.0000000 |
| H | -3.2753227 | -0.5285757 | 0.0000000 |
| H | -1.9737448 | 3.9449972  | 0.0000000 |
| H | -3.7281267 | 3.5978583  | 0.0000000 |
| H | 3.7281267  | -3.5978583 | 0.0000000 |
| H | 1.9737448  | -3.9449972 | 0.0000000 |

#### DADA07

140

|   |             |           |            |
|---|-------------|-----------|------------|
| C | -4.9535472  | 4.4948261 | 0.8983411  |
| C | -6.1328183  | 3.7958315 | 0.6728674  |
| C | -3.7211966  | 3.8486032 | 0.9281871  |
| C | -3.6606681  | 2.4550390 | 0.7122583  |
| C | -6.0915907  | 2.4140307 | 0.4748980  |
| C | -4.8544094  | 1.7731670 | 0.4935091  |
| O | -2.5500350  | 4.5168362 | 1.1541547  |
| N | -7.2293333  | 1.6229949 | 0.2576719  |
| C | -8.4929053  | 2.0434245 | -0.0468701 |
| C | -9.4888411  | 0.9101010 | -0.2322788 |
| C | -10.4132800 | 1.1443264 | -1.4254346 |
| C | -11.4647176 | 0.0454925 | -1.5548350 |
| O | -8.8221523  | 3.2179088 | -0.1628450 |
| C | -2.4132718  | 1.6304172 | 0.6582107  |
| N | -1.2533974  | 2.2311631 | 0.9610990  |
| C | 0.0115969   | 1.5528552 | 0.8966411  |
| C | 1.1071904   | 2.5610910 | 1.2266591  |
| N | 2.3547694   | 2.1025566 | 0.9572645  |
| C | 3.5631869   | 2.7962412 | 1.1304503  |
| C | 3.6929607   | 3.9413993 | 1.9176811  |
| C | 4.9297632   | 4.5645064 | 2.0293308  |
| C | 6.0508820   | 4.0727339 | 1.3680272  |
| C | 5.9378853   | 2.9124537 | 0.5758343  |
| C | 4.6897654   | 2.3028332 | 0.4781329  |
| C | 7.0279650   | 2.2642423 | -0.2234113 |
| N | 8.2068721   | 2.9130699 | -0.3142062 |
| C | 9.2903548   | 2.4765316 | -1.1757443 |
| C | 9.5341858   | 3.4182554 | -2.3612727 |
| C | 9.8818352   | 4.8340948 | -1.9008937 |
| O | 6.8254068   | 1.1840906 | -0.7944029 |

|   |             |            |            |
|---|-------------|------------|------------|
| O | -2.4507400  | 0.4282496  | 0.3404221  |
| O | 0.8394086   | 3.6647455  | 1.6904202  |
| O | 7.2786396   | 4.6815195  | 1.4594561  |
| C | -2.5930323  | 5.9182157  | 1.3931427  |
| C | 7.3925427   | 5.8523482  | 2.2618349  |
| C | 10.6412843  | 2.8367645  | -3.2406388 |
| H | -5.0081384  | 5.5633916  | 1.0519894  |
| H | -7.0799780  | 4.3109438  | 0.6426893  |
| H | -4.7987456  | 0.7061660  | 0.3308730  |
| H | -7.0876170  | 0.6172227  | 0.3510647  |
| H | -8.9658867  | -0.0427005 | -0.3314349 |
| H | -10.0878084 | 0.8531198  | 0.6841968  |
| H | -10.8873820 | 2.1207200  | -1.3118049 |
| H | -9.8136940  | 1.1945461  | -2.3393946 |
| H | -12.0821700 | -0.0132914 | -0.6538629 |
| H | -10.9977587 | -0.9330065 | -1.7015497 |
| H | -12.1277913 | 0.2278859  | -2.4031362 |
| H | -1.2354430  | 3.2079818  | 1.2364554  |
| H | 0.0575615   | 0.7249105  | 1.6126735  |
| H | 0.1860840   | 1.1230326  | -0.0910988 |
| H | 2.4208482   | 1.1867827  | 0.5051118  |
| H | 2.8326027   | 4.3464457  | 2.4259468  |
| H | 5.0049580   | 5.4494956  | 2.6449973  |
| H | 4.6113882   | 1.4263434  | -0.1504782 |
| H | 8.2903256   | 3.7769790  | 0.2026295  |
| H | 10.2069243  | 2.3902919  | -0.5819200 |
| H | 9.0252897   | 1.4848747  | -1.5360380 |
| H | 8.6067049   | 3.4572495  | -2.9426481 |
| H | 10.0604901  | 5.4882180  | -2.7568789 |
| H | 10.7898574  | 4.8294032  | -1.2890468 |
| H | 9.0747445   | 5.2778967  | -1.3126607 |
| H | -3.1910640  | 6.1437569  | 2.2800793  |
| H | -2.9998763  | 6.4484157  | 0.5279318  |
| H | -1.5592747  | 6.2116952  | 1.5571302  |
| H | 7.1456260   | 5.6346808  | 3.3037886  |
| H | 6.7446519   | 6.6476617  | 1.8848919  |
| H | 8.4334908   | 6.1575256  | 2.1862937  |
| H | 11.5807969  | 2.7656890  | -2.6839233 |
| H | 10.8187524  | 3.4673327  | -4.1142913 |
| H | 10.3825134  | 1.8353922  | -3.5923178 |
| C | 2.5930323   | -5.9182157 | -1.3931427 |
| C | -7.3925427  | -5.8523482 | -2.2618349 |
| C | -4.9297632  | -4.5645064 | -2.0293308 |
| O | 2.5500350   | -4.5168362 | -1.1541547 |
| C | -3.6929607  | -3.9413993 | -1.9176811 |
| O | -0.8394086  | -3.6647455 | -1.6904202 |
| C | 4.9535472   | -4.4948261 | -0.8983411 |
| O | -7.2786396  | -4.6815195 | -1.4594561 |
| C | 3.7211966   | -3.8486032 | -0.9281871 |
| C | -6.0508820  | -4.0727339 | -1.3680272 |
| C | 6.1328183   | -3.7958315 | -0.6728674 |
| C | -9.8818352  | -4.8340948 | 1.9008937  |
| C | -1.1071904  | -2.5610910 | -1.2266591 |
| C | -3.5631869  | -2.7962412 | -1.1304503 |
| N | 1.2533974   | -2.2311631 | -0.9610990 |
| C | 3.6606681   | -2.4550390 | -0.7122583 |
| N | -2.3547694  | -2.1025566 | -0.9572645 |

|   |             |            |            |
|---|-------------|------------|------------|
| C | -5.9378853  | -2.9124537 | -0.5758343 |
| C | -0.0115969  | -1.5528552 | -0.8966411 |
| C | -4.6897654  | -2.3028332 | -0.4781329 |
| C | 6.0915907   | -2.4140307 | -0.4748980 |
| C | 2.4132718   | -1.6304172 | -0.6582107 |
| C | -9.5341858  | -3.4182554 | 2.3612727  |
| O | 8.8221523   | -3.2179088 | 0.1628450  |
| C | 4.8544094   | -1.7731670 | -0.4935091 |
| C | -7.0279650  | -2.2642423 | 0.2234113  |
| C | 8.4929053   | -2.0434245 | 0.0468701  |
| N | 7.2293333   | -1.6229949 | -0.2576719 |
| O | -6.8254068  | -1.1840906 | 0.7944029  |
| N | -8.2068721  | -2.9130699 | 0.3142062  |
| C | -10.6412843 | -2.8367645 | 3.2406388  |
| O | 2.4507400   | -0.4282496 | -0.3404221 |
| C | 9.4888411   | -0.9101010 | 0.2322788  |
| C | -9.2903548  | -2.4765316 | 1.1757443  |
| C | 10.4132800  | -1.1443264 | 1.4254346  |
| C | 11.4647176  | -0.0454925 | 1.5548350  |
| H | 2.9998763   | -6.4484157 | -0.5279318 |
| H | 3.1910640   | -6.1437569 | -2.2800793 |
| H | 1.5592747   | -6.2116952 | -1.5571302 |
| H | -6.7446519  | -6.6476617 | -1.8848919 |
| H | -7.1456260  | -5.6346808 | -3.3037886 |
| H | -8.4334908  | -6.1575256 | -2.1862937 |
| H | -5.0049580  | -5.4494956 | -2.6449973 |
| H | -2.8326027  | -4.3464457 | -2.4259468 |
| H | 5.0081384   | -5.5633916 | -1.0519894 |
| H | 7.0799780   | -4.3109438 | -0.6426893 |
| H | -9.0747445  | -5.2778967 | 1.3126607  |
| H | -10.7898574 | -4.8294032 | 1.2890468  |
| H | -10.0604901 | -5.4882180 | 2.7568789  |
| H | 1.2354430   | -3.2079818 | -1.2364554 |
| H | -2.4208482  | -1.1867827 | -0.5051118 |
| H | -0.0575615  | -0.7249105 | -1.6126735 |
| H | -0.1860840  | -1.1230326 | 0.0910988  |
| H | -4.6113882  | -1.4263434 | 0.1504782  |
| H | -8.6067049  | -3.4572495 | 2.9426481  |
| H | 4.7987456   | -0.7061660 | -0.3308730 |
| H | 7.0876170   | -0.6172227 | -0.3510647 |
| H | -8.2903256  | -3.7769790 | -0.2026295 |
| H | -11.5807969 | -2.7656890 | 2.6839233  |
| H | -10.3825134 | -1.8353922 | 3.5923178  |
| H | -10.8187524 | -3.4673327 | 4.1142913  |
| H | 8.9658867   | 0.0427005  | 0.3314349  |
| H | 10.0878084  | -0.8531198 | -0.6841968 |
| H | -10.2069243 | -2.3902919 | 0.5819200  |
| H | -9.0252897  | -1.4848747 | 1.5360380  |
| H | 10.8873820  | -2.1207200 | 1.3118049  |
| H | 9.8136940   | -1.1945461 | 2.3393946  |
| H | 10.9977587  | 0.9330065  | 1.7015497  |
| H | 12.0821700  | 0.0132914  | 0.6538629  |
| H | 12.1277913  | -0.2278859 | 2.4031362  |

**DADA08**

38

|   |            |            |           |
|---|------------|------------|-----------|
| N | 1.5406905  | -1.0479636 | 0.0000000 |
| C | 2.2744162  | -2.1768296 | 0.0000000 |
| C | 3.6984566  | -2.1505023 | 0.0000000 |
| C | 4.3383755  | -0.9430295 | 0.0000000 |
| C | 3.3621863  | 2.6671236  | 0.0000000 |
| C | 1.9251931  | 2.5494553  | 0.0000000 |
| N | 1.4264813  | 1.2562942  | 0.0000000 |
| C | 2.1895701  | 0.1222806  | 0.0000000 |
| C | 3.5961490  | 0.2537143  | 0.0000000 |
| C | 4.1510813  | 1.5605630  | 0.0000000 |
| N | 1.6128477  | -3.3447529 | 0.0000000 |
| H | 4.2488498  | -3.0826744 | 0.0000000 |
| H | 5.4216619  | -0.8942676 | 0.0000000 |
| H | 0.5821678  | -3.3858169 | 0.0000000 |
| H | 5.2317577  | 1.6617388  | 0.0000000 |
| H | 3.7660982  | 3.6692842  | 0.0000000 |
| O | 1.1488318  | 3.5180306  | 0.0000000 |
| H | 2.1342396  | -4.2029866 | 0.0000000 |
| H | 0.3961150  | 1.1527608  | 0.0000000 |
| N | -1.5406905 | 1.0479636  | 0.0000000 |
| C | -2.2744162 | 2.1768296  | 0.0000000 |
| C | -3.6984566 | 2.1505023  | 0.0000000 |
| C | -4.3383755 | 0.9430295  | 0.0000000 |
| C | -3.3621863 | -2.6671236 | 0.0000000 |
| C | -1.9251931 | -2.5494553 | 0.0000000 |
| N | -1.4264813 | -1.2562942 | 0.0000000 |
| C | -2.1895701 | -0.1222806 | 0.0000000 |
| C | -3.5961490 | -0.2537143 | 0.0000000 |
| C | -4.1510813 | -1.5605630 | 0.0000000 |
| N | -1.6128477 | 3.3447529  | 0.0000000 |
| H | -4.2488498 | 3.0826744  | 0.0000000 |
| H | -5.4216619 | 0.8942676  | 0.0000000 |
| H | -0.5821678 | 3.3858169  | 0.0000000 |
| H | -5.2317577 | -1.6617388 | 0.0000000 |
| H | -3.7660982 | -3.6692842 | 0.0000000 |
| O | -1.1488318 | -3.5180306 | 0.0000000 |
| H | -2.1342396 | 4.2029866  | 0.0000000 |
| H | -0.3961150 | -1.1527608 | 0.0000000 |

### 3. Detailed SAPT analysis

Here, we report the full SAPT analysis for all dimers.

**Table S3.1.** Full SAPT analysis for the DDAA dimers. Yellow rows mark direct hydrogen bonds, blue rows diagonal interactions. Energies in kJ/mol.

| DDAA01          |       |         |        |        |        |        |         |
|-----------------|-------|---------|--------|--------|--------|--------|---------|
| Frag1           | Frag2 | Elst    | Exch   | IndAB  | IndBA  | Disp   | Total   |
| D1              | A3    | -40.06  | 42.57  | -6.35  | -7.65  | -20.80 | -32.28  |
| D1              | A4    | -4.52   | 0.00   | -0.34  | -0.63  | -0.27  | -5.75   |
| D1              | D3    | 0.71    | 0.00   | 0.08   | -0.10  | -0.05  | 0.65    |
| D1              | D4    | 0.24    | 0.00   | 0.03   | 0.03   | 0.00   | 0.29    |
| D2              | A3    | -5.49   | 5.30   | -1.56  | -2.35  | -8.82  | -12.92  |
| D2              | A4    | -47.05  | 41.54  | -10.74 | -8.07  | -15.87 | -40.19  |
| D2              | D3    | 1.48    | 9.02   | 0.11   | 0.11   | -5.87  | 4.84    |
| D2              | D4    | 0.71    | 0.00   | -0.10  | 0.08   | -0.05  | 0.65    |
| A1              | A3    | -3.66   | 0.00   | -0.35  | -0.46  | -0.25  | -4.72   |
| A1              | A4    | -24.05  | 0.38   | -2.62  | -2.62  | -1.45  | -30.36  |
| A1              | D3    | -47.05  | 41.54  | -8.07  | -10.74 | -15.87 | -40.19  |
| A1              | D4    | -4.52   | 0.00   | -0.63  | -0.34  | -0.27  | -5.75   |
| A2              | A3    | -0.44   | 0.00   | -0.21  | -0.21  | -0.10  | -0.96   |
| A2              | A4    | -3.66   | 0.00   | -0.46  | -0.35  | -0.25  | -4.72   |
| A2              | D3    | -5.49   | 5.30   | -2.35  | -1.56  | -8.82  | -12.92  |
| A2              | D4    | -40.06  | 42.57  | -7.65  | -6.35  | -20.80 | -32.28  |
| D1              | All   | -43.63  | 42.57  | -6.57  | -8.35  | -21.11 | -37.09  |
| D2              | All   | -50.36  | 55.86  | -12.30 | -10.23 | -30.61 | -47.63  |
| A1              | All   | -79.28  | 41.93  | -11.66 | -14.17 | -17.84 | -81.01  |
| A2              | All   | -49.64  | 47.87  | -10.67 | -8.47  | -29.97 | -50.88  |
| All             | A3    | -49.64  | 47.87  | -8.47  | -10.67 | -29.97 | -50.88  |
| All             | A4    | -79.28  | 41.93  | -14.17 | -11.66 | -17.84 | -81.01  |
| All             | D3    | -50.36  | 55.86  | -10.23 | -12.30 | -30.61 | -47.63  |
| All             | D4    | -43.63  | 42.57  | -8.35  | -6.57  | -21.11 | -37.09  |
| All             | All   | -222.90 | 188.23 | -41.21 | -41.21 | -99.52 | -216.61 |
| direct H-bonds  |       | -174.21 | 168.22 | -32.80 | -32.80 | -73.34 | -144.94 |
| direct diagonal |       | -42.60  | 20.01  | -7.39  | -7.39  | -25.49 | -62.85  |
| the rest        |       | -6.10   | 0.01   | -1.01  | -1.01  | -0.70  | -8.81   |

DDAA02

| Frag1           | Frag2 | Elst    | Exch   | IndAB  | IndBA  | Disp   | Total   |
|-----------------|-------|---------|--------|--------|--------|--------|---------|
| D1              | A3    | -50.12  | 77.89  | -8.92  | -16.98 | -12.14 | -10.27  |
| D1              | A4    | 1.08    | 0.86   | -1.03  | -1.12  | -1.95  | -2.16   |
| D1              | D3    | 0.22    | 0.00   | -0.06  | -0.11  | -0.19  | -0.14   |
| D1              | D4    | 0.04    | 0.00   | -0.01  | -0.01  | -0.03  | 0.00    |
| D2              | A3    | -6.79   | 2.27   | -0.40  | -5.47  | -3.02  | -13.40  |
| D2              | A4    | -77.95  | 59.79  | -9.31  | -17.94 | -11.42 | -56.84  |
| D2              | D3    | 11.09   | 0.36   | -0.41  | -0.41  | -1.50  | 9.13    |
| D2              | D4    | 0.22    | 0.00   | -0.11  | -0.06  | -0.19  | -0.14   |
| A1              | A3    | -22.32  | 0.11   | -2.43  | -2.76  | -0.65  | -28.05  |
| A1              | A4    | -22.43  | 2.31   | -5.68  | -5.68  | -3.57  | -35.06  |
| A1              | D3    | -77.96  | 59.80  | -17.95 | -9.31  | -11.42 | -56.84  |
| A1              | D4    | 1.08    | 0.86   | -1.12  | -1.03  | -1.95  | -2.15   |
| A2              | A3    | -0.66   | 0.00   | -1.06  | -1.06  | -0.11  | -2.89   |
| A2              | A4    | -22.32  | 0.11   | -2.76  | -2.43  | -0.65  | -28.05  |
| A2              | D3    | -6.79   | 2.27   | -5.47  | -0.39  | -3.02  | -13.40  |
| A2              | D4    | -50.11  | 77.87  | -16.97 | -8.91  | -12.14 | -10.26  |
| D1              | All   | -48.78  | 78.75  | -10.00 | -18.21 | -14.31 | -12.56  |
| D2              | All   | -73.43  | 62.42  | -10.23 | -23.88 | -16.12 | -61.24  |
| A1              | All   | -121.64 | 63.08  | -27.18 | -18.79 | -17.59 | -122.11 |
| A2              | All   | -79.88  | 80.25  | -26.25 | -12.79 | -15.92 | -54.59  |
| All             | A3    | -79.90  | 80.27  | -12.80 | -26.26 | -15.92 | -54.61  |
| All             | A4    | -121.63 | 63.07  | -18.78 | -27.17 | -17.59 | -122.10 |
| All             | D3    | -73.44  | 62.44  | -23.88 | -10.23 | -16.12 | -61.24  |
| All             | D4    | -48.77  | 78.73  | -18.21 | -10.00 | -14.30 | -12.55  |
| All             | All   | -323.73 | 284.50 | -73.67 | -73.67 | -63.94 | -250.49 |
| direct H-bonds  |       | -256.15 | 275.35 | -53.14 | -53.14 | -47.12 | -134.20 |
| direct diagonal |       | -22.76  | 8.93   | -14.10 | -14.10 | -15.00 | -57.04  |
| the rest        |       | -44.83  | 0.23   | -6.42  | -6.42  | -1.82  | -59.26  |

DDAA03

| Frag1           | Frag2 | Elst    | Exch   | IndAB  | IndBA  | Disp   | Total   |
|-----------------|-------|---------|--------|--------|--------|--------|---------|
| D1              | A3    | -78.85  | 62.41  | -8.77  | -16.07 | -13.03 | -54.30  |
| D1              | A4    | 4.16    | 1.75   | 1.89   | -5.84  | -4.77  | -2.81   |
| D1              | D3    | 1.81    | 0.03   | 0.14   | -0.05  | -0.39  | 1.53    |
| D1              | D4    | 6.41    | 0.00   | 0.20   | 0.20   | -0.17  | 6.63    |
| D2              | A3    | 4.39    | 0.89   | -2.37  | 0.24   | -1.66  | 1.49    |
| D2              | A4    | -28.36  | 43.40  | -3.28  | -7.29  | -9.59  | -5.12   |
| D2              | D3    | 1.73    | 0.67   | -0.01  | -0.01  | -1.27  | 1.12    |
| D2              | D4    | 1.80    | 0.03   | -0.05  | 0.14   | -0.39  | 1.53    |
| A1              | A3    | -10.84  | 0.01   | -1.44  | -1.51  | -0.74  | -14.52  |
| A1              | A4    | -10.37  | 2.12   | -3.09  | -3.09  | -4.79  | -19.23  |
| A1              | D3    | -28.36  | 43.39  | -7.29  | -3.28  | -9.59  | -5.12   |
| A1              | D4    | 4.15    | 1.75   | -5.84  | 1.89   | -4.77  | -2.81   |
| A2              | A3    | 1.24    | 0.00   | 0.06   | 0.06   | -0.09  | 1.27    |
| A2              | A4    | -10.84  | 0.01   | -1.51  | -1.44  | -0.74  | -14.52  |
| A2              | D3    | 4.39    | 0.89   | 0.24   | -2.37  | -1.66  | 1.50    |
| A2              | D4    | -78.84  | 62.41  | -16.07 | -8.77  | -13.03 | -54.30  |
| D1              | All   | -66.48  | 64.19  | -6.55  | -21.76 | -18.36 | -48.95  |
| D2              | All   | -20.44  | 44.98  | -5.71  | -6.92  | -12.90 | -0.98   |
| A1              | All   | -45.41  | 47.27  | -17.66 | -5.99  | -19.89 | -41.68  |
| A2              | All   | -84.05  | 63.31  | -17.28 | -12.52 | -15.52 | -66.05  |
| All             | A3    | -84.06  | 63.31  | -12.52 | -17.28 | -15.52 | -66.06  |
| All             | A4    | -45.41  | 47.28  | -5.99  | -17.66 | -19.89 | -41.68  |
| All             | D3    | -20.43  | 44.97  | -6.92  | -5.71  | -12.90 | -0.98   |
| All             | D4    | -66.48  | 64.20  | -21.76 | -6.55  | -18.36 | -48.94  |
| All             | All   | -216.38 | 219.76 | -47.19 | -47.19 | -66.67 | -157.66 |
| direct H-bonds  |       | -214.41 | 211.61 | -35.41 | -35.41 | -45.23 | -118.84 |
| direct diagonal |       | 8.46    | 8.07   | -9.18  | -9.18  | -18.91 | -20.75  |
| the rest        |       | -10.43  | 0.08   | -2.60  | -2.60  | -2.52  | -18.07  |

## DDAA04

| Frag1           | Frag2 | Elst    | Exch   | IndAB  | IndBA  | Disp   | Total   |
|-----------------|-------|---------|--------|--------|--------|--------|---------|
| D1              | A3    | -47.78  | 21.49  | -4.98  | -6.70  | -6.72  | -44.70  |
| D1              | A4    | -12.19  | 1.84   | 0.63   | -4.89  | -3.63  | -18.23  |
| D1              | D3    | 7.40    | 0.09   | 0.45   | -0.34  | -0.66  | 6.95    |
| D1              | D4    | 5.82    | 0.00   | 0.10   | 0.10   | -0.12  | 5.90    |
| D2              | A3    | -0.45   | 0.19   | -1.75  | -0.39  | -1.29  | -3.69   |
| D2              | A4    | -50.22  | 73.81  | -7.94  | -13.44 | -13.13 | -10.93  |
| D2              | D3    | 14.61   | 0.72   | 1.36   | 1.36   | -2.63  | 15.42   |
| D2              | D4    | 7.40    | 0.09   | -0.34  | 0.45   | -0.66  | 6.95    |
| A1              | A3    | -3.26   | 0.00   | -0.93  | -0.07  | -0.43  | -4.68   |
| A1              | A4    | -3.66   | 2.38   | -1.47  | -1.47  | -3.32  | -7.54   |
| A1              | D3    | -50.22  | 73.81  | -13.44 | -7.94  | -13.13 | -10.93  |
| A1              | D4    | -12.19  | 1.84   | -4.89  | 0.63   | -3.63  | -18.23  |
| A2              | A3    | -2.83   | 0.00   | -0.15  | -0.15  | -0.09  | -3.21   |
| A2              | A4    | -3.26   | 0.00   | -0.07  | -0.93  | -0.43  | -4.68   |
| A2              | D3    | -0.45   | 0.19   | -0.39  | -1.75  | -1.29  | -3.69   |
| A2              | D4    | -47.78  | 21.49  | -6.70  | -4.98  | -6.72  | -44.70  |
| D1              | All   | -46.74  | 23.42  | -3.80  | -11.82 | -11.13 | -50.08  |
| D2              | All   | -28.66  | 74.81  | -8.67  | -12.03 | -17.71 | 7.76    |
| A1              | All   | -69.32  | 78.02  | -20.73 | -8.86  | -20.51 | -41.39  |
| A2              | All   | -54.32  | 21.68  | -7.31  | -7.80  | -8.53  | -56.28  |
| All             | A3    | -54.32  | 21.68  | -7.80  | -7.31  | -8.53  | -56.28  |
| All             | A4    | -69.32  | 78.02  | -8.86  | -20.72 | -20.51 | -41.38  |
| All             | D3    | -28.66  | 74.82  | -12.03 | -8.67  | -17.71 | 7.76    |
| All             | D4    | -46.74  | 23.42  | -11.82 | -3.80  | -11.13 | -50.08  |
| All             | All   | -199.04 | 197.93 | -40.51 | -40.50 | -57.87 | -139.99 |
| direct H-bonds  |       | -195.99 | 190.59 | -33.07 | -33.07 | -39.71 | -111.25 |
| direct diagonal |       | -14.32  | 7.16   | -6.51  | -6.51  | -15.78 | -35.96  |
| the rest        |       | 11.28   | 0.18   | -0.93  | -0.93  | -2.38  | 7.22    |



DDAA05

| Frag1           | Frag2 | Elst    | Exch   | IndAB  | IndBA  | Disp   | Total   |
|-----------------|-------|---------|--------|--------|--------|--------|---------|
| D1              | A3    | -45.65  | 62.12  | -4.72  | -11.29 | -12.56 | -12.10  |
| D1              | A4    | 1.49    | 0.40   | -0.97  | -0.18  | -1.42  | -0.67   |
| D1              | D3    | 0.44    | 0.00   | 0.03   | 0.06   | -0.15  | 0.38    |
| D1              | D4    | 0.08    | 0.00   | 0.04   | 0.04   | -0.02  | 0.14    |
| D2              | A3    | 18.52   | 2.16   | 1.79   | -5.06  | -4.04  | 13.38   |
| D2              | A4    | -71.64  | 35.28  | -6.37  | -10.16 | -8.27  | -61.15  |
| D2              | D3    | 9.61    | 0.23   | -0.10  | -0.10  | -1.21  | 8.44    |
| D2              | D4    | 0.44    | 0.00   | 0.06   | 0.03   | -0.15  | 0.38    |
| A1              | A3    | -19.99  | 0.14   | -0.88  | -1.67  | -0.97  | -23.36  |
| A1              | A4    | -14.41  | 1.87   | -3.26  | -3.26  | -3.06  | -22.12  |
| A1              | D3    | -71.64  | 35.28  | -10.15 | -6.37  | -8.27  | -61.15  |
| A1              | D4    | 1.50    | 0.40   | -0.18  | -0.97  | -1.42  | -0.67   |
| A2              | A3    | 18.38   | 0.00   | -0.83  | -0.83  | -0.28  | 16.43   |
| A2              | A4    | -19.98  | 0.14   | -1.67  | -0.88  | -0.96  | -23.36  |
| A2              | D3    | 18.52   | 2.16   | -5.06  | 1.79   | -4.04  | 13.38   |
| A2              | D4    | -45.65  | 62.11  | -11.29 | -4.72  | -12.56 | -12.10  |
| D1              | All   | -43.64  | 62.52  | -5.61  | -11.37 | -14.15 | -12.25  |
| D2              | All   | -43.07  | 37.68  | -4.61  | -15.28 | -13.66 | -38.95  |
| A1              | All   | -104.54 | 37.68  | -14.47 | -12.26 | -13.72 | -107.30 |
| A2              | All   | -28.73  | 64.41  | -18.85 | -4.64  | -17.84 | -5.65   |
| All             | A3    | -28.74  | 64.42  | -4.64  | -18.85 | -17.85 | -5.65   |
| All             | A4    | -104.54 | 37.68  | -12.26 | -14.47 | -13.71 | -107.31 |
| All             | D3    | -43.07  | 37.68  | -15.28 | -4.61  | -13.66 | -38.95  |
| All             | D4    | -43.63  | 62.51  | -11.37 | -5.61  | -14.15 | -12.25  |
| All             | All   | -219.97 | 202.29 | -43.54 | -43.55 | -59.37 | -164.15 |
| direct H-bonds  |       | -234.58 | 194.78 | -32.53 | -32.53 | -41.65 | -146.51 |
| direct diagonal |       | 35.24   | 7.23   | -7.77  | -7.77  | -15.19 | 11.74   |
| the rest        |       | -20.63  | 0.27   | -3.25  | -3.25  | -2.53  | -29.38  |

**DDAA06 (tautomer)**

| Frag1                  | Frag2 | Elst           | Exch          | IndAB         | IndBA         | Disp          | Total          |
|------------------------|-------|----------------|---------------|---------------|---------------|---------------|----------------|
| D1                     | A3    | -69.60         | 107.11        | -12.84        | -24.08        | -12.76        | -12.18         |
| D1                     | A4    | 5.03           | 2.93          | -1.10         | -4.25         | -4.62         | -2.02          |
| D1                     | D3    | -0.83          | 0.04          | -2.08         | -1.05         | -0.99         | -4.91          |
| D1                     | D4    | -0.02          | 0.00          | -0.07         | -0.07         | -0.05         | -0.20          |
| D2                     | A3    | -21.48         | 1.99          | -3.14         | -5.79         | -2.15         | -30.57         |
| D2                     | A4    | -104.60        | 84.54         | -16.07        | -29.39        | -15.32        | -80.84         |
| D2                     | D3    | 8.46           | 2.93          | -8.00         | -8.00         | -8.36         | -12.96         |
| D2                     | D4    | -0.83          | 0.04          | -1.05         | -2.08         | -0.99         | -4.91          |
| A1                     | A3    | -10.87         | 0.00          | -1.89         | -1.69         | -0.12         | -14.57         |
| A1                     | A4    | -19.08         | 2.40          | -5.26         | -5.26         | -1.94         | -29.14         |
| A1                     | D3    | -104.60        | 84.54         | -29.39        | -16.07        | -15.32        | -80.84         |
| A1                     | D4    | 5.03           | 2.93          | -4.25         | -1.10         | -4.62         | -2.02          |
| A2                     | A3    | -0.85          | 0.00          | -0.50         | -0.50         | 0.00          | -1.85          |
| A2                     | A4    | -10.87         | 0.00          | -1.69         | -1.89         | -0.12         | -14.57         |
| A2                     | D3    | -21.48         | 1.99          | -5.79         | -3.14         | -2.15         | -30.57         |
| A2                     | D4    | -69.60         | 107.11        | -24.08        | -12.84        | -12.76        | -12.18         |
| D1                     | All   | -65.42         | 110.08        | -16.10        | -29.45        | -18.42        | -19.30         |
| D2                     | All   | -118.45        | 89.50         | -28.25        | -45.25        | -26.83        | -129.28        |
| A1                     | All   | -129.52        | 89.86         | -40.79        | -24.12        | -21.99        | -126.57        |
| A2                     | All   | -102.81        | 109.09        | -32.06        | -18.38        | -15.02        | -59.17         |
| All                    | A3    | -102.81        | 109.09        | -18.38        | -32.06        | -15.02        | -59.17         |
| All                    | A4    | -129.52        | 89.86         | -24.12        | -40.79        | -21.99        | -126.57        |
| All                    | D3    | -118.45        | 89.50         | -45.25        | -28.25        | -26.83        | -129.28        |
| All                    | D4    | -65.42         | 110.08        | -29.45        | -16.10        | -18.42        | -19.30         |
| All                    | All   | -416.20        | 398.54        | -117.20       | -117.20       | -82.26        | -334.32        |
| <b>direct H-bonds</b>  |       | <b>-348.39</b> | <b>383.29</b> | <b>-82.39</b> | <b>-82.39</b> | <b>-56.16</b> | <b>-186.04</b> |
| <b>direct diagonal</b> |       | <b>-43.53</b>  | <b>15.16</b>  | <b>-27.54</b> | <b>-27.54</b> | <b>-23.84</b> | <b>-107.28</b> |
| <b>the rest</b>        |       | <b>-24.28</b>  | <b>0.08</b>   | <b>-7.28</b>  | <b>-7.28</b>  | <b>-2.26</b>  | <b>-41.02</b>  |

DDAA07

| Frag1           | Frag2 | Elst    | Exch   | IndAB  | IndBA  | Disp   | Total   |
|-----------------|-------|---------|--------|--------|--------|--------|---------|
| D1              | A3    | -49.99  | 81.31  | -10.72 | -16.32 | -13.68 | -9.40   |
| D1              | A4    | 3.47    | 0.99   | -1.65  | -0.68  | -2.38  | -0.26   |
| D1              | D3    | -0.49   | 0.00   | 0.00   | -0.12  | -0.24  | -0.84   |
| D1              | D4    | 0.08    | 0.00   | -0.03  | -0.03  | -0.05  | -0.03   |
| D2              | A3    | -7.06   | 2.23   | -0.24  | -5.59  | -3.10  | -13.76  |
| D2              | A4    | -82.73  | 64.43  | -10.47 | -19.65 | -12.12 | -60.53  |
| D2              | D3    | 10.89   | 0.38   | -0.44  | -0.44  | -1.56  | 8.83    |
| D2              | D4    | -0.49   | 0.00   | -0.12  | 0.00   | -0.24  | -0.84   |
| A1              | A3    | -22.91  | 0.12   | -2.51  | -2.74  | -0.67  | -28.71  |
| A1              | A4    | -22.81  | 2.43   | -6.05  | -6.05  | -3.75  | -36.21  |
| A1              | D3    | -82.73  | 64.43  | -19.65 | -10.47 | -12.12 | -60.53  |
| A1              | D4    | 3.47    | 0.99   | -0.68  | -1.65  | -2.38  | -0.26   |
| A2              | A3    | -0.91   | 0.00   | -1.08  | -1.08  | -0.12  | -3.17   |
| A2              | A4    | -22.91  | 0.12   | -2.74  | -2.51  | -0.67  | -28.71  |
| A2              | D3    | -7.06   | 2.23   | -5.59  | -0.24  | -3.10  | -13.76  |
| A2              | D4    | -49.99  | 81.31  | -16.32 | -10.72 | -13.68 | -9.40   |
| D1              | All   | -46.94  | 82.30  | -12.40 | -17.14 | -16.34 | -10.53  |
| D2              | All   | -79.40  | 67.05  | -11.27 | -25.68 | -17.01 | -66.30  |
| A1              | All   | -124.98 | 67.97  | -28.89 | -20.91 | -18.92 | -125.72 |
| A2              | All   | -80.87  | 83.65  | -25.72 | -14.55 | -17.57 | -55.05  |
| All             | A3    | -80.87  | 83.65  | -14.55 | -25.72 | -17.57 | -55.05  |
| All             | A4    | -124.98 | 67.97  | -20.91 | -28.89 | -18.92 | -125.72 |
| All             | D3    | -79.40  | 67.05  | -25.68 | -11.27 | -17.01 | -66.30  |
| All             | D4    | -46.94  | 82.30  | -17.14 | -12.40 | -16.34 | -10.53  |
| All             | All   | -332.18 | 300.96 | -78.27 | -78.27 | -69.84 | -257.60 |
| direct H-bonds  |       | -265.44 | 291.48 | -57.16 | -57.16 | -51.59 | -139.87 |
| direct diagonal |       | -19.12  | 9.25   | -14.65 | -14.65 | -16.26 | -55.43  |
| the rest        |       | -47.63  | 0.24   | -6.47  | -6.47  | -1.99  | -62.31  |

## DDAA08

| Frag1           | Frag2 | Elst    | Exch   | IndAB  | IndBA  | Disp   | Total   |
|-----------------|-------|---------|--------|--------|--------|--------|---------|
| D1              | A3    | -47.32  | 78.40  | -8.49  | -15.72 | -13.91 | -7.04   |
| D1              | A4    | 3.01    | 0.94   | -2.04  | -0.50  | -2.12  | -0.70   |
| D1              | D3    | -0.49   | 0.00   | -0.02  | -0.11  | -0.24  | -0.85   |
| D1              | D4    | 0.08    | 0.00   | -0.03  | -0.03  | -0.05  | -0.03   |
| D2              | A3    | -0.57   | 2.18   | 0.73   | -6.12  | -3.37  | -7.15   |
| D2              | A4    | -81.24  | 58.07  | -9.97  | -17.34 | -11.19 | -61.68  |
| D2              | D3    | 9.58    | 0.39   | -0.46  | -0.46  | -1.52  | 7.51    |
| D2              | D4    | -0.49   | 0.00   | -0.11  | -0.02  | -0.24  | -0.85   |
| A1              | A3    | -22.88  | 0.13   | -1.88  | -2.64  | -0.83  | -28.09  |
| A1              | A4    | -22.59  | 2.08   | -5.30  | -5.30  | -3.29  | -34.41  |
| A1              | D3    | -81.23  | 58.06  | -17.33 | -9.97  | -11.19 | -61.66  |
| A1              | D4    | 3.01    | 0.94   | -0.50  | -2.04  | -2.12  | -0.70   |
| A3              | A3    | 5.34    | 0.01   | -1.16  | -1.16  | -0.32  | 2.71    |
| A3              | A4    | -22.87  | 0.13   | -2.64  | -1.88  | -0.83  | -28.09  |
| A3              | D3    | -0.58   | 2.18   | -6.12  | 0.73   | -3.37  | -7.15   |
| A3              | D4    | -47.32  | 78.39  | -15.72 | -8.49  | -13.91 | -7.05   |
| D1              | All   | -44.72  | 79.34  | -10.58 | -16.36 | -16.31 | -8.62   |
| D2              | All   | -72.73  | 60.63  | -9.82  | -23.93 | -16.32 | -62.17  |
| A1              | All   | -123.69 | 61.21  | -25.01 | -19.95 | -17.42 | -124.87 |
| A3              | All   | -65.44  | 80.70  | -25.63 | -10.80 | -18.42 | -39.58  |
| All             | A3    | -65.43  | 80.71  | -10.80 | -25.63 | -18.42 | -39.58  |
| All             | A4    | -123.70 | 61.21  | -19.95 | -25.01 | -17.42 | -124.88 |
| All             | D3    | -72.72  | 60.63  | -23.93 | -9.82  | -16.32 | -62.16  |
| All             | D4    | -44.72  | 79.34  | -16.36 | -10.58 | -16.31 | -8.63   |
| All             | All   | -306.57 | 281.89 | -71.04 | -71.04 | -68.47 | -235.24 |
| direct H-bonds  |       | -257.12 | 272.92 | -51.52 | -51.52 | -50.20 | -137.43 |
| direct diagonal |       | -8.15   | 8.70   | -13.69 | -13.69 | -15.78 | -42.61  |
| the rest        |       | -41.30  | 0.27   | -5.84  | -5.84  | -2.49  | -55.20  |

| DDAA Average    |       |         |        |        |        |        |         |
|-----------------|-------|---------|--------|--------|--------|--------|---------|
| Frag1           | Frag2 | Elst    | Exch   | IndAB  | IndBA  | Disp   | Total   |
| D1              | A3    | -52.97  | 67.97  | -8.25  | -14.50 | -13.28 | -21.04  |
| D1              | A4    | 0.50    | 1.18   | -0.74  | -2.06  | -2.58  | -3.70   |
| D1              | D3    | 0.92    | 0.02   | -0.16  | -0.21  | -0.35  | 0.21    |
| D1              | D4    | 1.42    | 0.00   | 0.02   | 0.02   | -0.06  | 1.41    |
| D2              | A3    | -2.17   | 2.15   | -0.69  | -4.07  | -3.42  | -8.20   |
| D2              | A4    | -69.45  | 57.66  | -9.35  | -15.62 | -12.01 | -48.77  |
| D2              | D3    | 8.56    | 1.68   | -0.94  | -0.94  | -2.83  | 5.54    |
| D2              | D4    | 0.92    | 0.02   | -0.21  | -0.16  | -0.35  | 0.21    |
| A1              | A3    | -15.51  | 0.07   | -1.58  | -1.80  | -0.61  | -19.42  |
| A1              | A4    | -18.00  | 2.00   | -4.23  | -4.23  | -3.16  | -27.61  |
| A1              | D3    | -69.45  | 57.66  | -15.62 | -9.35  | -12.01 | -48.77  |
| A1              | D4    | 0.50    | 1.18   | -2.06  | -0.74  | -2.58  | -3.70   |
| A2              | A3    | 2.73    | 0.00   | -0.68  | -0.68  | -0.16  | 1.23    |
| A2              | A4    | -15.51  | 0.07   | -1.80  | -1.58  | -0.61  | -19.42  |
| A2              | D3    | -2.17   | 2.15   | -4.07  | -0.69  | -3.42  | -8.20   |
| A2              | D4    | -52.96  | 67.96  | -14.50 | -8.25  | -13.28 | -21.03  |
| D1              | All   | -50.12  | 69.17  | -9.13  | -16.76 | -16.27 | -23.11  |
| D2              | All   | -62.14  | 61.51  | -11.19 | -20.79 | -18.61 | -51.22  |
| A1              | All   | -102.45 | 60.91  | -23.49 | -16.11 | -18.37 | -99.50  |
| A2              | All   | -67.91  | 70.19  | -21.04 | -11.19 | -17.47 | -47.43  |
| All             | A3    | -67.91  | 70.19  | -11.19 | -21.05 | -17.47 | -47.43  |
| All             | A4    | -102.45 | 60.91  | -16.11 | -23.49 | -18.37 | -99.50  |
| All             | D3    | -62.14  | 61.51  | -20.79 | -11.19 | -18.61 | -51.21  |
| All             | D4    | -50.12  | 69.16  | -16.76 | -9.13  | -16.27 | -23.11  |
| All             | All   | -282.61 | 261.78 | -64.85 | -64.85 | -70.71 | -221.25 |
| direct H-bonds  |       | -244.82 | 251.24 | -47.72 | -47.73 | -50.58 | -139.61 |
| direct diagonal |       | -12.77  | 10.36  | -12.72 | -12.72 | -18.00 | -45.86  |
| the rest        |       | -25.02  | 0.18   | -4.40  | -4.40  | -2.13  | -35.78  |

**Table S3.2.** Full SAPT analysis for the DADA dimers. Yellow rows mark direct hydrogen bonds, blue rows diagonal interactions. Energies in kJ/mol.

| DADA01          |       |         |        |        |        |        |         |
|-----------------|-------|---------|--------|--------|--------|--------|---------|
| Frag1           | Frag2 | Elst    | Exch   | IndAB  | IndBA  | Disp   | Total   |
| D1              | A3    | -63.30  | 74.96  | -9.05  | -19.15 | -13.03 | -29.58  |
| D1              | D3    | 4.21    | 0.64   | 0.27   | -0.12  | -1.52  | 3.49    |
| D1              | A4    | 2.74    | 0.05   | 0.51   | -0.90  | -0.56  | 1.85    |
| D1              | D4    | 1.88    | 0.00   | -0.09  | -0.09  | -0.05  | 1.66    |
| A1              | A3    | -29.08  | 2.01   | -3.82  | -3.18  | -3.20  | -37.28  |
| A1              | D3    | -27.30  | 38.68  | -7.42  | -2.33  | -8.52  | -6.89   |
| A1              | A4    | -14.81  | 0.80   | 0.09   | 0.09   | -3.59  | -17.42  |
| A1              | D4    | 2.74    | 0.05   | -0.90  | 0.51   | -0.56  | 1.85    |
| D2              | A3    | 1.31    | 0.03   | 0.48   | 0.06   | -0.28  | 1.61    |
| D2              | D3    | 0.88    | 0.68   | 0.00   | 0.00   | -1.15  | 0.40    |
| D2              | A4    | -27.30  | 38.68  | -2.33  | -7.42  | -8.52  | -6.89   |
| D2              | D4    | 4.21    | 0.64   | -0.12  | 0.27   | -1.52  | 3.49    |
| A2              | A3    | -2.07   | 0.00   | -0.72  | -0.72  | -0.09  | -3.59   |
| A2              | D3    | 1.31    | 0.03   | 0.06   | 0.48   | -0.28  | 1.61    |
| A2              | A4    | -29.08  | 2.01   | -3.18  | -3.82  | -3.20  | -37.28  |
| A2              | D4    | -63.30  | 74.96  | -19.15 | -9.05  | -13.03 | -29.58  |
| D1              | All   | -54.46  | 75.66  | -8.36  | -20.26 | -15.15 | -22.59  |
| A1              | All   | -68.44  | 41.55  | -12.05 | -4.92  | -15.87 | -59.73  |
| D2              | All   | -20.90  | 40.04  | -1.98  | -7.10  | -11.46 | -1.39   |
| A2              | All   | -93.14  | 77.01  | -23.00 | -13.11 | -16.60 | -68.84  |
| All             | A3    | -93.14  | 77.01  | -13.11 | -23.00 | -16.60 | -68.84  |
| All             | D3    | -20.90  | 40.04  | -7.10  | -1.98  | -11.46 | -1.39   |
| All             | A4    | -68.44  | 41.55  | -4.92  | -12.05 | -15.87 | -59.73  |
| All             | D4    | -54.46  | 75.66  | -20.26 | -8.36  | -15.15 | -22.59  |
| All             | All   | -236.94 | 234.27 | -45.38 | -45.38 | -59.09 | -152.54 |
| direct H-bonds  |       | -181.19 | 227.29 | -37.96 | -37.96 | -43.11 | -72.93  |
| direct diagonal |       | -63.66  | 6.79   | -6.77  | -6.77  | -14.18 | -84.60  |
| the rest        |       | 7.91    | 0.17   | -0.65  | -0.65  | -1.80  | 4.98    |

**DADA02**

| Frag1                  | Frag2 | Elst           | Exch          | IndAB         | IndBA         | Disp          | Total         |
|------------------------|-------|----------------|---------------|---------------|---------------|---------------|---------------|
| D1                     | A3    | -52.26         | 76.57         | -10.13        | -16.92        | -12.11        | -14.84        |
| D1                     | D3    | 2.30           | 0.64          | 0.25          | -0.18         | -1.29         | 1.73          |
| D1                     | A4    | 1.66           | 0.03          | 0.70          | -0.14         | -0.43         | 1.83          |
| D1                     | D4    | 0.06           | 0.00          | -0.03         | -0.03         | -0.03         | -0.03         |
| A1                     | A3    | -32.56         | 1.96          | -3.00         | -3.75         | -3.06         | -40.41        |
| A1                     | D3    | -22.30         | 30.32         | -5.43         | -2.60         | -7.31         | -7.33         |
| A1                     | A4    | -10.20         | 0.93          | 0.08          | 0.08          | -3.49         | -12.61        |
| A1                     | D4    | 1.66           | 0.03          | -0.14         | 0.70          | -0.43         | 1.83          |
| D2                     | A3    | 0.84           | 0.02          | 0.47          | 0.03          | -0.24         | 1.11          |
| D2                     | D3    | 0.98           | 0.37          | 0.04          | 0.04          | -0.91         | 0.54          |
| D2                     | A4    | -22.30         | 30.31         | -2.60         | -5.43         | -7.31         | -7.32         |
| D2                     | D4    | 2.30           | 0.64          | -0.18         | 0.25          | -1.29         | 1.73          |
| A2                     | A3    | -3.75          | 0.00          | -0.56         | -0.56         | -0.09         | -4.96         |
| A2                     | D3    | 0.84           | 0.02          | 0.03          | 0.47          | -0.24         | 1.11          |
| A2                     | A4    | -32.56         | 1.96          | -3.75         | -3.00         | -3.06         | -40.41        |
| A2                     | D4    | -52.26         | 76.57         | -16.92        | -10.13        | -12.11        | -14.85        |
| D1                     | All   | -48.24         | 77.25         | -9.21         | -17.26        | -13.86        | -11.32        |
| A1                     | All   | -63.40         | 33.24         | -8.49         | -5.58         | -14.29        | -58.52        |
| D2                     | All   | -18.18         | 31.34         | -2.26         | -5.11         | -9.74         | -3.95         |
| A2                     | All   | -87.73         | 78.54         | -21.19        | -13.21        | -15.50        | -59.09        |
| All                    | A3    | -87.73         | 78.55         | -13.22        | -21.19        | -15.50        | -59.09        |
| All                    | D3    | -18.18         | 31.34         | -5.11         | -2.26         | -9.74         | -3.95         |
| All                    | A4    | -63.39         | 33.24         | -5.58         | -8.49         | -14.29        | -58.51        |
| All                    | D4    | -48.24         | 77.25         | -17.26        | -9.21         | -13.86        | -11.32        |
| All                    | All   | -217.54        | 220.37        | -41.16        | -41.16        | -53.39        | -132.88       |
| <b>direct H-bonds</b>  |       | <b>-149.12</b> | <b>213.76</b> | <b>-35.08</b> | <b>-35.08</b> | <b>-38.82</b> | <b>-44.34</b> |
| <b>direct diagonal</b> |       | <b>-69.73</b>  | <b>6.51</b>   | <b>-6.56</b>  | <b>-6.56</b>  | <b>-13.09</b> | <b>-89.43</b> |
| <b>the rest</b>        |       | <b>1.30</b>    | <b>0.10</b>   | <b>0.48</b>   | <b>0.48</b>   | <b>-1.47</b>  | <b>0.90</b>   |

**DADA03**

| Frag1                  | Frag2 | Elst           | Exch          | IndAB         | IndBA         | Disp          | Total         |
|------------------------|-------|----------------|---------------|---------------|---------------|---------------|---------------|
| D1                     | A3    | -53.24         | 77.74         | -10.13        | -17.23        | -12.28        | -15.13        |
| D1                     | D3    | 2.11           | 0.62          | 0.22          | -0.22         | -1.26         | 1.46          |
| D1                     | A4    | 1.62           | 0.03          | 0.78          | -0.11         | -0.44         | 1.87          |
| D1                     | D4    | 0.03           | 0.00          | -0.04         | -0.04         | -0.03         | -0.08         |
| A1                     | A3    | -29.82         | 1.89          | -2.91         | -3.47         | -3.08         | -37.38        |
| A1                     | D3    | -20.01         | 25.12         | -4.49         | -2.31         | -6.66         | -8.35         |
| A1                     | A4    | -7.78          | 0.82          | 0.20          | 0.20          | -3.55         | -10.11        |
| A1                     | D4    | 1.62           | 0.03          | -0.11         | 0.78          | -0.44         | 1.87          |
| D2                     | A3    | 0.78           | 0.01          | 0.43          | 0.02          | -0.23         | 1.00          |
| D2                     | D3    | 1.06           | 0.31          | 0.07          | 0.07          | -0.84         | 0.66          |
| D2                     | A4    | -20.01         | 25.12         | -2.31         | -4.49         | -6.66         | -8.35         |
| D2                     | D4    | 2.11           | 0.62          | -0.22         | 0.22          | -1.26         | 1.46          |
| A2                     | A3    | -3.61          | 0.00          | -0.54         | -0.54         | -0.08         | -4.77         |
| A2                     | D3    | 0.78           | 0.01          | 0.02          | 0.43          | -0.23         | 1.00          |
| A2                     | A4    | -29.82         | 1.89          | -3.47         | -2.91         | -3.08         | -37.38        |
| A2                     | D4    | -53.24         | 77.73         | -17.22        | -10.13        | -12.28        | -15.13        |
| D1                     | All   | -49.48         | 78.39         | -9.17         | -17.59        | -14.02        | -11.87        |
| A1                     | All   | -55.98         | 27.86         | -7.31         | -4.79         | -13.73        | -53.97        |
| D2                     | All   | -16.05         | 26.05         | -2.03         | -4.19         | -8.99         | -5.22         |
| A2                     | All   | -85.89         | 79.64         | -21.22        | -13.15        | -15.66        | -56.28        |
| All                    | A3    | -85.89         | 79.65         | -13.15        | -21.22        | -15.66        | -56.29        |
| All                    | D3    | -16.05         | 26.05         | -4.19         | -2.03         | -8.99         | -5.22         |
| All                    | A4    | -55.99         | 27.86         | -4.79         | -7.31         | -13.73        | -53.97        |
| All                    | D4    | -49.48         | 78.38         | -17.59        | -9.17         | -14.01        | -11.87        |
| All                    | All   | -207.41        | 211.93        | -39.73        | -39.73        | -52.40        | -127.34       |
| <b>direct H-bonds</b>  |       | <b>-146.49</b> | <b>205.71</b> | <b>-34.15</b> | <b>-34.16</b> | <b>-37.87</b> | <b>-46.96</b> |
| <b>direct diagonal</b> |       | <b>-62.13</b>  | <b>6.13</b>   | <b>-6.12</b>  | <b>-6.12</b>  | <b>-13.06</b> | <b>-81.29</b> |
| <b>the rest</b>        |       | <b>1.21</b>    | <b>0.10</b>   | <b>0.54</b>   | <b>0.54</b>   | <b>-1.46</b>  | <b>0.91</b>   |



**DADA04**

| Frag1                  | Frag2 | Elst           | Exch          | IndAB         | IndBA         | Disp          | Total          |
|------------------------|-------|----------------|---------------|---------------|---------------|---------------|----------------|
| D1                     | A3    | -56.97         | 56.36         | -8.67         | -12.19        | -24.54        | -46.01         |
| D1                     | D3    | 8.61           | 0.12          | 1.35          | 0.34          | -0.83         | 9.60           |
| D1                     | A4    | -2.18          | 0.01          | -0.12         | -0.20         | -0.27         | -2.75          |
| D1                     | D4    | 0.36           | 0.00          | 0.06          | 0.06          | -0.08         | 0.40           |
| A1                     | A3    | -4.16          | 7.83          | -1.83         | -2.93         | -5.36         | -6.45          |
| A1                     | D3    | -65.25         | 48.08         | -13.85        | -4.71         | -10.80        | -46.51         |
| A1                     | A4    | 16.16          | 7.51          | 0.85          | 0.85          | -3.67         | 21.70          |
| A1                     | D4    | -2.18          | 0.01          | -0.20         | -0.12         | -0.27         | -2.75          |
| D2                     | A3    | -3.36          | 0.06          | 0.21          | -0.06         | -0.49         | -3.64          |
| D2                     | D3    | 23.13          | 0.25          | 1.15          | 1.15          | -0.88         | 24.80          |
| D2                     | A4    | -65.23         | 48.08         | -4.71         | -13.84        | -10.79        | -46.50         |
| D2                     | D4    | 8.60           | 0.12          | 0.34          | 1.35          | -0.83         | 9.59           |
| A2                     | A3    | -3.71          | 0.00          | -0.52         | -0.52         | -0.19         | -4.94          |
| A2                     | D3    | -3.36          | 0.06          | -0.06         | 0.21          | -0.49         | -3.64          |
| A2                     | A4    | -4.16          | 7.83          | -2.93         | -1.83         | -5.36         | -6.45          |
| A2                     | D4    | -56.97         | 56.37         | -12.19        | -8.67         | -24.54        | -46.00         |
| D1                     | All   | -50.19         | 56.50         | -7.38         | -11.99        | -25.71        | -38.77         |
| A1                     | All   | -55.43         | 63.43         | -15.02        | -6.91         | -20.09        | -34.02         |
| D2                     | All   | -36.86         | 48.51         | -3.01         | -11.40        | -12.98        | -15.75         |
| A2                     | All   | -68.20         | 64.26         | -15.70        | -10.81        | -30.58        | -61.03         |
| All                    | A3    | -68.20         | 64.26         | -10.81        | -15.70        | -30.58        | -61.04         |
| All                    | D3    | -36.87         | 48.52         | -11.40        | -3.01         | -12.99        | -15.76         |
| All                    | A4    | -55.42         | 63.42         | -6.91         | -15.01        | -20.09        | -34.01         |
| All                    | D4    | -50.19         | 56.50         | -11.99        | -7.38         | -25.71        | -38.76         |
| All                    | All   | <b>-210.68</b> | <b>232.70</b> | <b>-41.11</b> | <b>-41.11</b> | <b>-89.36</b> | <b>-149.56</b> |
| <b>direct H-bonds</b>  |       | <b>-244.42</b> | <b>208.89</b> | <b>-39.41</b> | <b>-39.41</b> | <b>-70.67</b> | <b>-185.02</b> |
| <b>direct diagonal</b> |       | <b>48.17</b>   | <b>23.66</b>  | <b>-1.06</b>  | <b>-1.06</b>  | <b>-16.91</b> | <b>52.79</b>   |
| <b>the rest</b>        |       | <b>-14.43</b>  | <b>0.16</b>   | <b>-0.64</b>  | <b>-0.64</b>  | <b>-1.79</b>  | <b>-17.33</b>  |

**DADA05**

| Frag1                  | Frag2 | Elst           | Exch          | IndAB         | IndBA         | Disp          | Total          |
|------------------------|-------|----------------|---------------|---------------|---------------|---------------|----------------|
| D1                     | A3    | -45.44         | 40.41         | -4.32         | -8.91         | -11.88        | -30.14         |
| D1                     | D3    | 17.26          | 0.19          | 1.17          | 1.08          | -1.77         | 17.93          |
| D1                     | A4    | -0.51          | 0.00          | 0.26          | -0.07         | -0.08         | -0.40          |
| D1                     | D4    | 0.42           | 0.00          | -0.04         | -0.04         | -0.02         | 0.32           |
| A1                     | A3    | -0.98          | 2.89          | -0.84         | -0.95         | -2.76         | -2.65          |
| A1                     | D3    | -72.43         | 43.04         | -12.25        | -8.94         | -14.67        | -65.26         |
| A1                     | A4    | -2.43          | 0.05          | -0.31         | -0.31         | -0.66         | -3.66          |
| A1                     | D4    | -0.51          | 0.00          | -0.07         | 0.26          | -0.08         | -0.40          |
| D2                     | A3    | -4.76          | 0.01          | 0.46          | -0.50         | -0.32         | -5.11          |
| D2                     | D3    | 24.66          | 2.99          | 0.90          | 0.90          | -5.42         | 24.02          |
| D2                     | A4    | -72.43         | 43.04         | -8.94         | -12.25        | -14.67        | -65.25         |
| D2                     | D4    | 17.27          | 0.19          | 1.08          | 1.17          | -1.77         | 17.94          |
| A2                     | A3    | -1.27          | 0.00          | -0.12         | -0.12         | 0.00          | -1.50          |
| A2                     | D3    | -4.76          | 0.01          | -0.50         | 0.46          | -0.32         | -5.11          |
| A2                     | A4    | -0.98          | 2.89          | -0.95         | -0.84         | -2.76         | -2.64          |
| A2                     | D4    | -45.44         | 40.40         | -8.91         | -4.32         | -11.88        | -30.14         |
| D1                     | All   | -28.27         | 40.60         | -2.93         | -7.95         | -13.74        | -12.29         |
| A1                     | All   | -76.35         | 45.97         | -13.47        | -9.94         | -18.17        | -71.96         |
| D2                     | All   | -35.27         | 46.23         | -6.50         | -10.68        | -22.19        | -28.40         |
| A2                     | All   | -52.45         | 43.30         | -10.48        | -4.81         | -14.96        | -39.40         |
| All                    | A3    | -52.45         | 43.31         | -4.81         | -10.48        | -14.96        | -39.40         |
| All                    | D3    | -35.27         | 46.23         | -10.68        | -6.50         | -22.19        | -28.40         |
| All                    | A4    | -76.35         | 45.97         | -9.94         | -13.47        | -18.17        | -71.95         |
| All                    | D4    | -28.26         | 40.59         | -7.95         | -2.93         | -13.74        | -12.29         |
| All                    | All   | -192.33        | 176.10        | -33.38        | -33.38        | -69.06        | -152.04        |
| <b>direct H-bonds</b>  |       | <b>-235.74</b> | <b>166.88</b> | <b>-34.41</b> | <b>-34.41</b> | <b>-53.11</b> | <b>-190.79</b> |
| <b>direct diagonal</b> |       | <b>54.79</b>   | <b>9.20</b>   | <b>1.05</b>   | <b>1.05</b>   | <b>-15.13</b> | <b>50.95</b>   |
| <b>the rest</b>        |       | <b>-11.39</b>  | <b>0.02</b>   | <b>-0.01</b>  | <b>-0.01</b>  | <b>-0.82</b>  | <b>-12.20</b>  |

**DADA06**

| Frag1                  | Frag2 | Elst           | Exch          | IndAB         | IndBA         | Disp          | Total         |
|------------------------|-------|----------------|---------------|---------------|---------------|---------------|---------------|
| D1                     | A3    | -71.84         | 83.00         | -10.78        | -21.11        | -14.18        | -34.91        |
| D1                     | D3    | 4.07           | 0.63          | 0.41          | -0.20         | -1.44         | 3.48          |
| D1                     | A4    | 3.18           | 0.04          | 0.78          | -0.77         | -0.54         | 2.69          |
| D1                     | D4    | 2.14           | 0.00          | -0.02         | -0.02         | -0.05         | 2.05          |
| A1                     | A3    | -25.35         | 2.05          | -3.13         | -3.12         | -3.20         | -32.74        |
| A1                     | D3    | -20.49         | 25.96         | -4.48         | -1.82         | -6.74         | -7.58         |
| A1                     | A4    | -11.97         | 0.63          | 0.37          | 0.37          | -3.22         | -13.82        |
| A1                     | D4    | 3.18           | 0.04          | -0.77         | 0.78          | -0.54         | 2.69          |
| D2                     | A3    | 0.95           | 0.02          | 0.25          | 0.04          | -0.26         | 1.01          |
| D2                     | D3    | 0.86           | 0.49          | 0.04          | 0.04          | -0.97         | 0.46          |
| D2                     | A4    | -20.49         | 25.95         | -1.82         | -4.48         | -6.74         | -7.58         |
| D2                     | D4    | 4.07           | 0.63          | -0.20         | 0.41          | -1.44         | 3.48          |
| A2                     | A3    | -4.11          | 0.00          | -0.72         | -0.73         | -0.09         | -5.65         |
| A2                     | D3    | 0.95           | 0.02          | 0.04          | 0.25          | -0.26         | 1.01          |
| A2                     | A4    | -25.35         | 2.05          | -3.12         | -3.13         | -3.20         | -32.73        |
| A2                     | D4    | -71.84         | 82.99         | -21.11        | -10.78        | -14.18        | -34.91        |
| D1                     | All   | -62.45         | 83.66         | -9.61         | -22.10        | -16.20        | -26.70        |
| A1                     | All   | -54.62         | 28.67         | -8.01         | -3.79         | -13.69        | -51.44        |
| D2                     | All   | -14.60         | 27.09         | -1.73         | -3.99         | -9.41         | -2.64         |
| A2                     | All   | -100.34        | 85.06         | -24.90        | -14.38        | -17.72        | -72.29        |
| All                    | A3    | -100.34        | 85.07         | -14.38        | -24.91        | -17.73        | -72.29        |
| All                    | D3    | -14.60         | 27.09         | -3.99         | -1.73         | -9.41         | -2.63         |
| All                    | A4    | -54.62         | 28.67         | -3.79         | -8.01         | -13.69        | -51.44        |
| All                    | D4    | -62.45         | 83.65         | -22.09        | -9.61         | -16.20        | -26.71        |
| All                    | All   | -232.01        | 224.48        | -44.25        | -44.26        | -57.03        | -153.07       |
| <b>direct H-bonds</b>  |       | <b>-184.65</b> | <b>217.90</b> | <b>-38.19</b> | <b>-38.20</b> | <b>-41.83</b> | <b>-84.98</b> |
| <b>direct diagonal</b> |       | <b>-53.66</b>  | <b>6.48</b>   | <b>-5.61</b>  | <b>-5.61</b>  | <b>-13.47</b> | <b>-71.88</b> |
| <b>the rest</b>        |       | <b>6.30</b>    | <b>0.11</b>   | <b>-0.45</b>  | <b>-0.45</b>  | <b>-1.73</b>  | <b>3.78</b>   |

**DADA07**

| Frag1                  | Frag2 | Elst           | Exch          | IndAB         | IndBA         | Disp          | Total          |
|------------------------|-------|----------------|---------------|---------------|---------------|---------------|----------------|
| D1                     | A3    | -59.21         | 53.53         | -9.95         | -10.10        | -26.00        | -51.73         |
| D1                     | D3    | 14.42          | 3.53          | 1.09          | 0.64          | -7.39         | 12.29          |
| D1                     | A4    | -1.14          | 0.00          | 0.34          | -0.14         | -0.21         | -1.14          |
| D1                     | D4    | 1.39           | 0.00          | -0.09         | -0.09         | -0.09         | 1.11           |
| A1                     | A3    | -3.11          | 0.02          | -0.50         | -0.51         | -0.55         | -4.65          |
| A1                     | D3    | -57.27         | 46.43         | -10.96        | -11.85        | -16.54        | -50.19         |
| A1                     | A4    | -19.92         | 0.27          | -1.96         | -1.96         | -1.15         | -24.71         |
| A1                     | D4    | -1.14          | 0.00          | -0.14         | 0.34          | -0.21         | -1.14          |
| D2                     | A3    | 0.13           | 0.00          | 0.22          | 0.01          | -0.08         | 0.28           |
| D2                     | D3    | 1.97           | 9.95          | 0.23          | 0.23          | -6.13         | 6.25           |
| D2                     | A4    | -57.27         | 46.43         | -11.85        | -10.96        | -16.53        | -50.19         |
| D2                     | D4    | 14.42          | 3.53          | 0.64          | 1.09          | -7.39         | 12.29          |
| A2                     | A3    | -1.00          | 0.00          | -0.07         | -0.07         | -0.01         | -1.13          |
| A2                     | D3    | 0.13           | 0.00          | 0.01          | 0.22          | -0.08         | 0.28           |
| A2                     | A4    | -3.11          | 0.02          | -0.51         | -0.50         | -0.55         | -4.65          |
| A2                     | D4    | -59.21         | 53.53         | -10.10        | -9.95         | -26.00        | -51.73         |
| D1                     | All   | -44.54         | 57.06         | -8.62         | -9.69         | -33.68        | -39.47         |
| A1                     | All   | -81.44         | 46.72         | -13.55        | -13.98        | -18.44        | -80.69         |
| D2                     | All   | -40.75         | 59.90         | -10.76        | -9.63         | -30.13        | -31.38         |
| A2                     | All   | -63.19         | 53.55         | -10.67        | -10.30        | -26.64        | -57.24         |
| All                    | A3    | -63.19         | 53.55         | -10.30        | -10.67        | -26.64        | -57.24         |
| All                    | D3    | -40.75         | 59.90         | -9.63         | -10.76        | -30.13        | -31.38         |
| All                    | A4    | -81.44         | 46.72         | -13.98        | -13.55        | -18.44        | -80.69         |
| All                    | D4    | -44.54         | 57.06         | -9.69         | -8.62         | -33.68        | -39.47         |
| All                    | All   | -229.92        | 217.23        | -43.60        | -43.60        | -108.89       | -208.78        |
| <b>direct H-bonds</b>  |       | <b>-232.96</b> | <b>199.91</b> | <b>-42.86</b> | <b>-42.86</b> | <b>-85.07</b> | <b>-203.84</b> |
| <b>direct diagonal</b> |       | <b>4.67</b>    | <b>17.32</b>  | <b>-1.01</b>  | <b>-1.01</b>  | <b>-23.15</b> | <b>-3.18</b>   |
| <b>the rest</b>        |       | <b>-1.62</b>   | <b>0.00</b>   | <b>0.27</b>   | <b>0.27</b>   | <b>-0.68</b>  | <b>-1.75</b>   |

| DADA08 (tautomer) |       |         |        |        |        |        |         |
|-------------------|-------|---------|--------|--------|--------|--------|---------|
| Frag1             | Frag2 | Elst    | Exch   | IndAB  | IndBA  | Disp   | Total   |
| D1                | A3    | -50.79  | 67.61  | -8.87  | -13.63 | -9.20  | -14.88  |
| D1                | D3    | 5.90    | 1.92   | 0.10   | -1.56  | -3.82  | 2.55    |
| D1                | A4    | 1.20    | 0.04   | 0.03   | -0.18  | -0.53  | 0.56    |
| D1                | D4    | 0.03    | 0.00   | -0.06  | -0.06  | -0.04  | -0.14   |
| A1                | A3    | -27.43  | 1.76   | -2.28  | -2.88  | -1.83  | -32.66  |
| A1                | D3    | -39.25  | 54.43  | -11.49 | -5.02  | -12.36 | -13.69  |
| A1                | A4    | -20.09  | 1.73   | -1.25  | -1.25  | -4.36  | -25.22  |
| A1                | D4    | 1.20    | 0.04   | -0.18  | 0.03   | -0.53  | 0.56    |
| D2                | A3    | 2.97    | 0.00   | 0.19   | 0.37   | -0.15  | 3.38    |
| D2                | D3    | 0.37    | 0.80   | -0.15  | -0.15  | -1.95  | -1.06   |
| D2                | A4    | -39.25  | 54.43  | -5.02  | -11.49 | -12.36 | -13.69  |
| D2                | D4    | 5.90    | 1.92   | -1.56  | 0.10   | -3.82  | 2.55    |
| A2                | A3    | -1.56   | 0.00   | -0.23  | -0.23  | 0.00   | -2.01   |
| A2                | D3    | 2.97    | 0.00   | 0.37   | 0.19   | -0.15  | 3.38    |
| A2                | A4    | -27.43  | 1.76   | -2.88  | -2.28  | -1.83  | -32.66  |
| A2                | D4    | -50.79  | 67.61  | -13.63 | -8.87  | -9.20  | -14.88  |
| D1                | All   | -43.66  | 69.58  | -8.80  | -15.43 | -13.59 | -11.91  |
| A1                | All   | -85.57  | 57.97  | -15.21 | -9.12  | -19.09 | -71.02  |
| D2                | All   | -30.00  | 57.15  | -6.54  | -11.16 | -18.28 | -8.82   |
| A2                | All   | -76.81  | 69.38  | -16.36 | -11.19 | -11.19 | -46.17  |
| All               | A3    | -76.81  | 69.38  | -11.19 | -16.36 | -11.19 | -46.17  |
| All               | D3    | -30.00  | 57.15  | -11.16 | -6.54  | -18.28 | -8.82   |
| All               | A4    | -85.57  | 57.97  | -9.12  | -15.21 | -19.09 | -71.02  |
| All               | D4    | -43.66  | 69.58  | -15.43 | -8.80  | -13.59 | -11.91  |
| All               | All   | -236.04 | 254.08 | -46.91 | -46.91 | -62.14 | -137.92 |
| direct H-bonds    |       | -180.07 | 244.09 | -39.01 | -39.01 | -43.14 | -57.15  |
| direct diagonal   |       | -62.78  | 9.90   | -8.02  | -8.02  | -17.61 | -86.51  |
| the rest          |       | 6.81    | 0.08   | 0.13   | 0.13   | -1.40  | 5.73    |

| DADA Average    |       |         |        |        |        |        |         |
|-----------------|-------|---------|--------|--------|--------|--------|---------|
| Frag1           | Frag2 | Elst    | Exch   | IndAB  | IndBA  | Disp   | Total   |
| D1              | A3    | -56.63  | 66.27  | -8.99  | -14.90 | -15.40 | -29.65  |
| D1              | D3    | 7.36    | 1.04   | 0.61   | -0.03  | -2.41  | 6.57    |
| D1              | A4    | 0.82    | 0.03   | 0.41   | -0.31  | -0.38  | 0.56    |
| D1              | D4    | 0.79    | 0.00   | -0.04  | -0.04  | -0.05  | 0.66    |
| A1              | A3    | -19.06  | 2.55   | -2.29  | -2.60  | -2.88  | -24.28  |
| A1              | D3    | -40.54  | 39.01  | -8.80  | -4.95  | -10.45 | -25.72  |
| A1              | A4    | -8.88   | 1.59   | -0.24  | -0.24  | -2.96  | -10.73  |
| A1              | D4    | 0.82    | 0.03   | -0.31  | 0.41   | -0.38  | 0.56    |
| D2              | A3    | -0.14   | 0.02   | 0.34   | 0.00   | -0.26  | -0.05   |
| D2              | D3    | 6.74    | 1.98   | 0.28   | 0.28   | -2.28  | 7.01    |
| D2              | A4    | -40.53  | 39.00  | -4.95  | -8.80  | -10.45 | -25.72  |
| D2              | D4    | 7.36    | 1.04   | -0.03  | 0.61   | -2.41  | 6.57    |
| A2              | A3    | -2.63   | 0.00   | -0.43  | -0.43  | -0.07  | -3.57   |
| A2              | D3    | -0.14   | 0.02   | 0.00   | 0.34   | -0.26  | -0.05   |
| A2              | A4    | -19.06  | 2.55   | -2.60  | -2.29  | -2.88  | -24.28  |
| A2              | D4    | -56.63  | 66.27  | -14.90 | -8.99  | -15.40 | -29.65  |
| D1              | All   | -47.66  | 67.34  | -8.01  | -15.28 | -18.24 | -21.86  |
| A1              | All   | -67.65  | 43.18  | -11.64 | -7.38  | -16.67 | -60.17  |
| D2              | All   | -26.58  | 42.04  | -4.35  | -7.91  | -15.40 | -12.19  |
| A2              | All   | -78.47  | 68.84  | -17.94 | -11.37 | -18.61 | -57.54  |
| All             | A3    | -78.47  | 68.85  | -11.37 | -17.94 | -18.61 | -57.54  |
| All             | D3    | -26.58  | 42.04  | -7.91  | -4.35  | -15.40 | -12.19  |
| All             | A4    | -67.65  | 43.17  | -7.38  | -11.64 | -16.67 | -60.17  |
| All             | D4    | -47.66  | 67.33  | -15.28 | -8.01  | -18.24 | -21.86  |
| All             | All   | -220.36 | 221.39 | -41.94 | -41.94 | -68.92 | -151.77 |
| direct H-bonds  |       | -194.33 | 210.55 | -37.64 | -37.64 | -51.70 | -110.75 |
| direct diagonal |       | -25.54  | 10.75  | -4.26  | -4.26  | -15.83 | -39.14  |
| the rest        |       | -0.49   | 0.09   | -0.04  | -0.04  | -1.39  | -1.87   |

**Table S3.3.** Full SAPT analysis for the DDAA06 dimer in a simulated solution phase. Average over 21 snapshots. Yellow rows mark direct hydrogen bonds, blue rows diagonal interactions. Energies in kJ/mol.

| Frag1           | Frag2 | Average |        |         |         |        | Total   |
|-----------------|-------|---------|--------|---------|---------|--------|---------|
|                 |       | Elst    | Exch   | IndAB   | IndBA   | Disp   |         |
| D1              | A3    | -67.00  | 111.03 | -15.11  | -21.83  | -13.03 | -5.94   |
| D1              | A4    | 3.67    | 3.20   | -2.62   | -3.14   | -4.69  | -3.57   |
| D1              | D3    | -0.49   | 0.04   | -2.84   | -0.65   | -1.02  | -4.95   |
| D1              | D4    | -0.01   | 0.00   | -0.05   | -0.05   | -0.05  | -0.16   |
| D2              | A3    | -22.36  | 2.12   | -3.49   | -5.41   | -2.11  | -31.25  |
| D2              | A4    | -107.69 | 84.39  | -17.66  | -28.39  | -15.31 | -84.67  |
| D2              | D3    | 3.33    | 2.94   | -8.78   | -8.31   | -8.39  | -19.22  |
| D2              | D4    | -0.55   | 0.04   | -0.69   | -2.69   | -1.02  | -4.91   |
| A1              | A3    | -12.16  | 0.00   | -1.97   | -1.61   | -0.11  | -15.85  |
| A1              | A4    | -23.10  | 2.34   | -5.62   | -5.37   | -1.91  | -33.66  |
| A1              | D3    | -108.08 | 84.34  | -28.91  | -17.25  | -15.30 | -85.20  |
| A1              | D4    | 3.90    | 3.18   | -3.22   | -2.46   | -4.69  | -3.29   |
| A2              | A3    | -0.82   | 0.00   | -0.50   | -0.48   | 0.00   | -1.80   |
| A2              | A4    | -12.23  | 0.00   | -1.68   | -1.92   | -0.11  | -15.93  |
| A2              | D3    | -22.84  | 2.11   | -5.62   | -3.36   | -2.11  | -31.82  |
| A2              | D4    | -67.10  | 110.63 | -21.90  | -14.90  | -13.00 | -6.27   |
| D1              | All   | -63.82  | 114.27 | -20.62  | -25.66  | -18.79 | -14.63  |
| D2              | All   | -127.28 | 89.48  | -30.61  | -44.80  | -26.84 | -140.05 |
| A1              | All   | -139.44 | 89.86  | -39.72  | -26.68  | -22.02 | -138.00 |
| A2              | All   | -103.00 | 112.75 | -29.69  | -20.65  | -15.22 | -55.82  |
| All             | A3    | -102.35 | 113.15 | -21.07  | -29.33  | -15.26 | -54.85  |
| All             | A4    | -139.35 | 89.93  | -27.57  | -38.81  | -22.02 | -137.83 |
| All             | D3    | -128.07 | 89.43  | -46.15  | -29.57  | -26.83 | -141.19 |
| All             | D4    | -63.76  | 113.85 | -25.86  | -20.09  | -18.77 | -14.62  |
| All             | All   | -433.54 | 406.36 | -120.64 | -117.80 | -82.87 | -348.49 |
| direct H-bonds  |       | -349.87 | 390.39 | -83.57  | -82.37  | -56.65 | -182.08 |
| direct diagonal |       | -57.40  | 15.89  | -29.34  | -28.04  | -23.91 | -122.81 |
| the rest        |       | -26.26  | 0.09   | -7.73   | -7.38   | -2.31  | -43.60  |

**Table S3.4.** Full SAPT analysis for the DADA08 dimer in a simulated solution phase. Average over 21 snapshots. Yellow rows mark direct hydrogen bonds, blue rows diagonal interactions. Energies in kJ/mol.

| Frag1           | Frag2 | Average |        |        |        |        | Total   |
|-----------------|-------|---------|--------|--------|--------|--------|---------|
|                 |       | Elst    | Exch   | IndAB  | IndBA  | Disp   |         |
| D1              | A3    | -48.97  | 69.77  | -10.55 | -12.58 | -9.34  | -11.67  |
| D1              | D3    | 3.68    | 2.07   | -1.74  | -1.31  | -3.87  | -1.17   |
| D1              | A4    | 1.22    | 0.04   | 0.99   | -0.14  | -0.54  | 1.57    |
| D1              | D4    | 0.01    | 0.00   | -0.04  | -0.05  | -0.05  | -0.13   |
| A1              | A3    | -26.59  | 1.86   | -2.80  | -2.38  | -1.80  | -31.71  |
| A1              | D3    | -46.05  | 55.00  | -12.69 | -5.75  | -12.43 | -21.91  |
| A1              | A4    | -13.20  | 1.78   | 0.06   | -0.13  | -4.41  | -15.92  |
| A1              | D4    | 1.09    | 0.04   | -0.15  | 0.82   | -0.54  | 1.26    |
| D2              | A3    | -0.48   | 0.00   | 0.23   | -0.09  | -0.15  | -0.48   |
| D2              | D3    | 3.07    | 0.79   | 0.44   | 0.35   | -1.94  | 2.72    |
| D2              | A4    | -46.22  | 55.20  | -5.79  | -12.85 | -12.41 | -22.08  |
| D2              | D4    | 4.03    | 2.05   | -1.25  | -1.55  | -3.87  | -0.58   |
| A2              | A3    | -1.60   | 0.00   | -0.22  | -0.21  | 0.00   | -2.03   |
| A2              | D3    | -1.12   | 0.00   | -0.17  | 0.24   | -0.15  | -1.19   |
| A2              | A4    | -25.74  | 1.88   | -2.27  | -2.77  | -1.80  | -30.69  |
| A2              | D4    | -48.11  | 69.49  | -12.38 | -10.38 | -9.33  | -10.70  |
| D1              | All   | -44.06  | 71.89  | -11.34 | -14.08 | -13.81 | -11.40  |
| A1              | All   | -84.75  | 58.68  | -15.58 | -7.45  | -19.18 | -68.28  |
| D2              | All   | -39.60  | 58.04  | -6.36  | -14.14 | -18.37 | -20.43  |
| A2              | All   | -76.56  | 71.37  | -15.03 | -13.12 | -11.28 | -44.62  |
| All             | A3    | -77.63  | 71.64  | -13.33 | -15.27 | -11.30 | -45.89  |
| All             | D3    | -40.42  | 57.87  | -14.16 | -6.46  | -18.39 | -21.56  |
| All             | A4    | -83.94  | 58.90  | -7.00  | -15.90 | -19.17 | -67.12  |
| All             | D4    | -42.97  | 71.58  | -13.82 | -11.16 | -13.78 | -10.16  |
| All             | All   | -244.97 | 259.98 | -48.32 | -48.79 | -62.64 | -144.73 |
| direct H-bonds  |       | -189.34 | 249.46 | -41.41 | -41.55 | -43.52 | -66.36  |
| direct diagonal |       | -54.74  | 10.43  | -7.56  | -7.80  | -17.70 | -77.36  |
| the rest        |       | -0.88   | 0.09   | 0.65   | 0.56   | -1.43  | -1.00   |



## 4. SAPT partitioning

**Figure S4.1.** The SAPT partitioning of the DDAA molecules is shown with the green lines.

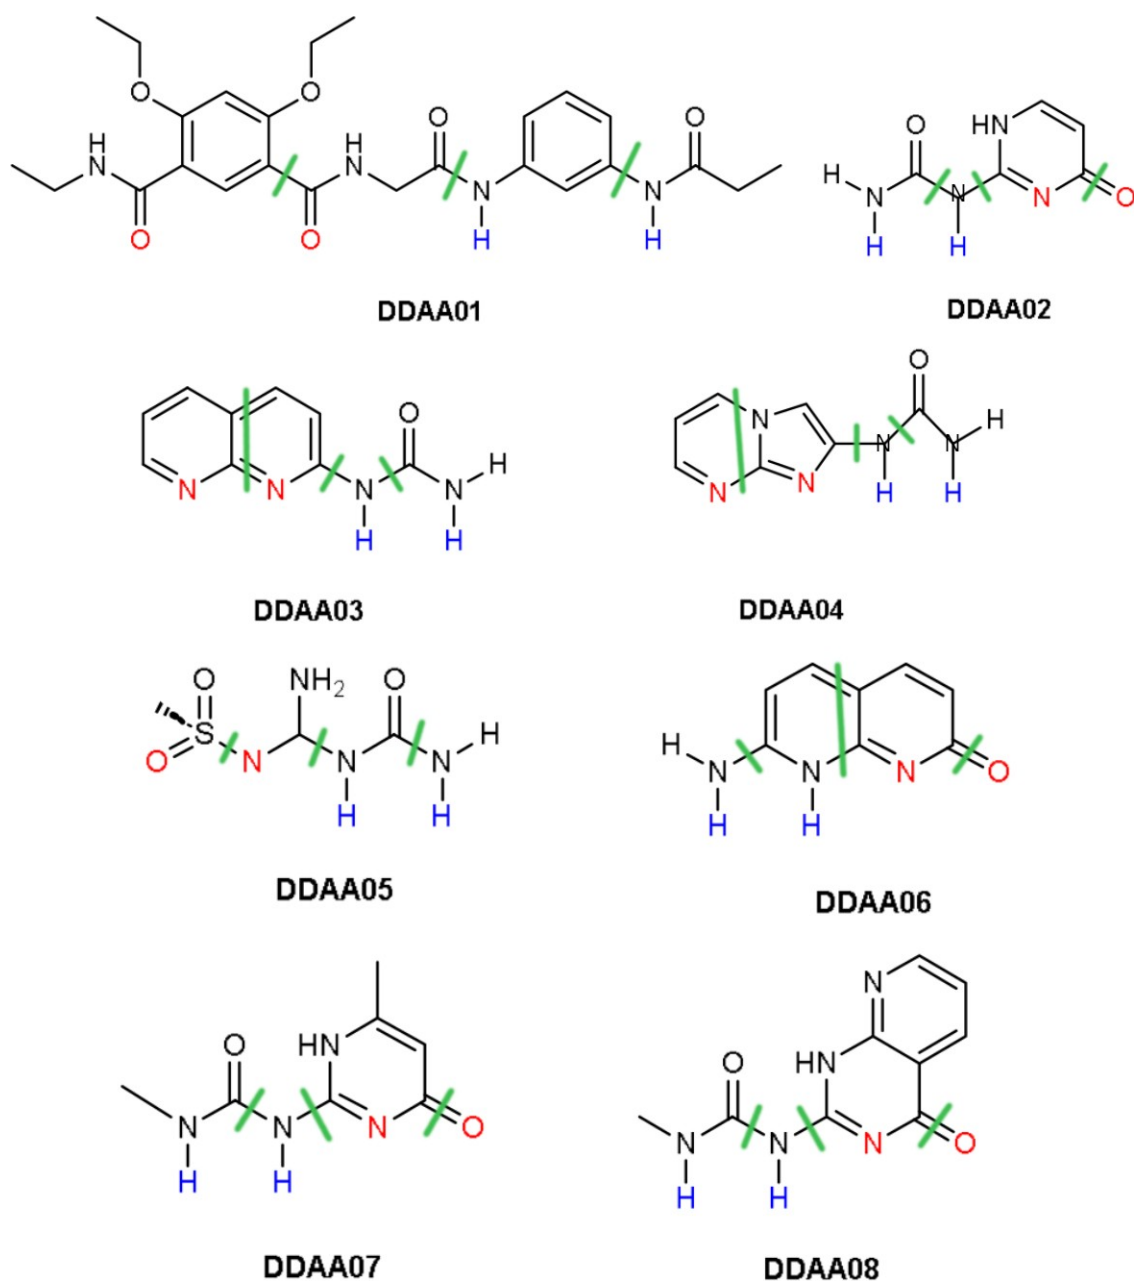

**Figure S4.2.** The SAPT partitioning of the DADA molecules is shown with the green lines.

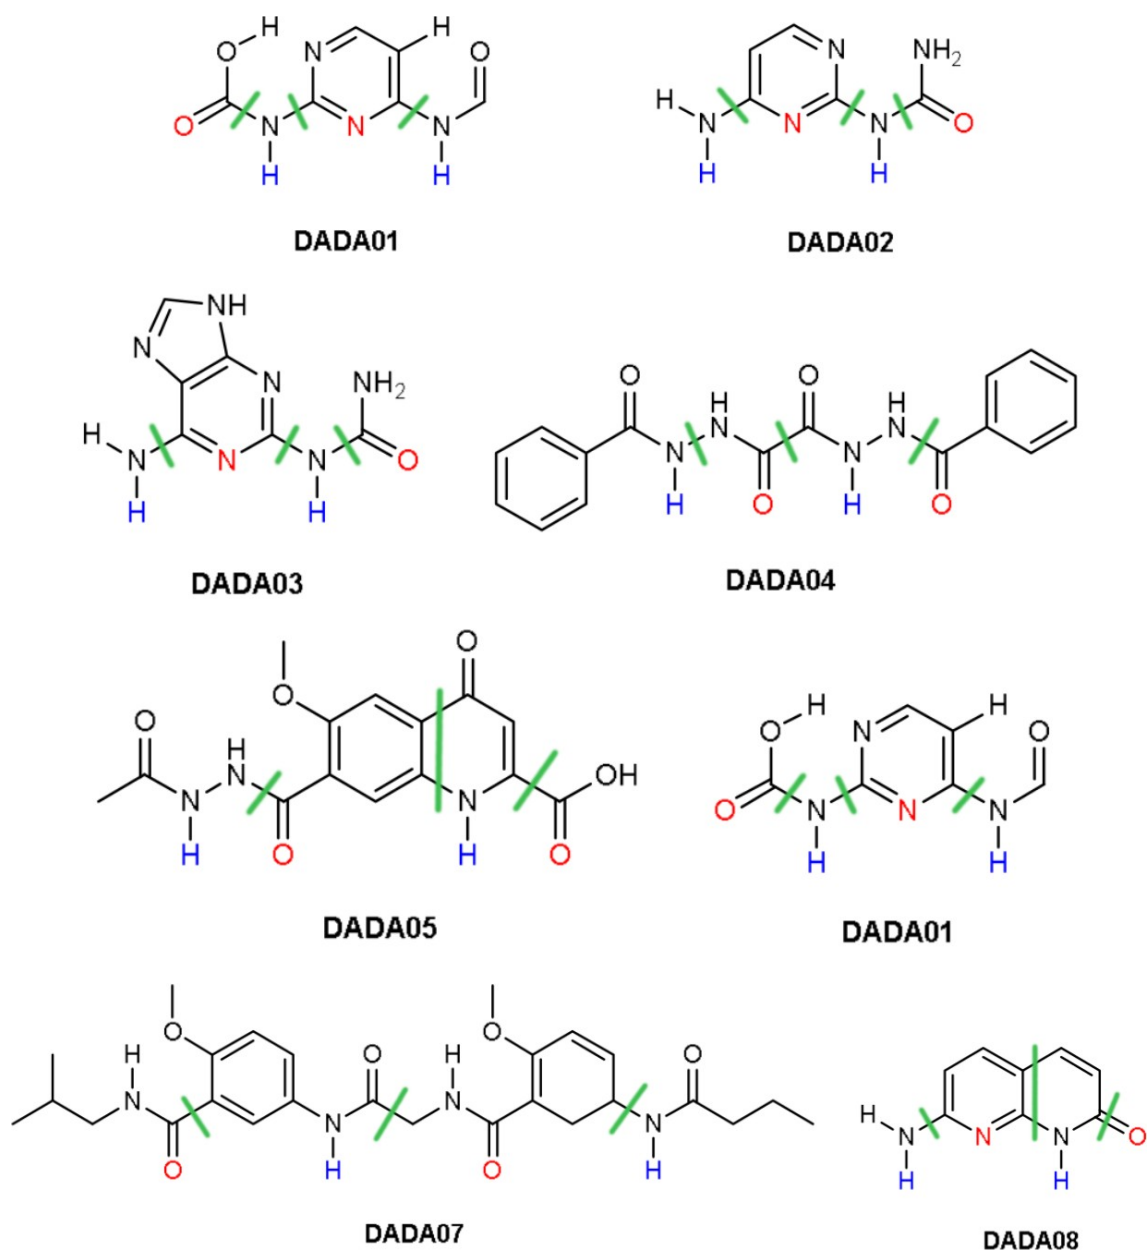

Supplement: d4cp02361g1.pdf [file d4cp02361g1.pdf]
